1 **Title: Chemotherapy induces a YAP1-dependent fetal conversion to human**  
2 **Colorectal Cancer cells that is predictive of poor patient outcome**

3  
4 **Authors:** Laura Solé<sup>1†</sup>, Teresa Lobo-Jarne<sup>1†</sup>, Alberto Villanueva<sup>2</sup>, Anna Vert<sup>1</sup>, Yolanda  
5 Guillén<sup>1</sup>, Irene Sangrador<sup>1</sup>, Antonio Barbachano<sup>3</sup>, Joan Lop<sup>4</sup>, Marta Guix<sup>5</sup>, Marta Salido<sup>4</sup>,  
6 Beatriz Bellosillo<sup>4</sup>, Raquel García-Romero<sup>1</sup>, Marta Garrido<sup>1</sup>, Jessica González<sup>1</sup>, María Martínez-  
7 Iniesta<sup>2</sup>, Erika Lopez-Arribillaga<sup>1,6</sup>, Ramón Salazar<sup>2</sup>, Clara Montagut<sup>5</sup>, Ferrán Torres<sup>7</sup>, Mar  
8 Iglesias<sup>4</sup>, Toni Celià-Terrassa<sup>1</sup>, Alberto Muñoz<sup>3</sup>, Anna Bigas<sup>1\*</sup> and Lluís Espinosa<sup>1\*</sup>.

9  
10 **Affiliations:**

11 <sup>1</sup>Cancer Research Program, Institut Mar d'Investigacions Mèdiques, CIBERONC, Hospital del  
12 Mar, Barcelona 08003, Spain

13 <sup>2</sup>Translational Research Laboratory, Institut d'Investigació Biomèdica de Bellvitge (IDIBELL),  
14 Institut Català d'Oncologia, Hospitalet, Barcelona 08907, Spain.

15 <sup>3</sup>Department of Cancer Biology, Instituto de Investigaciones Biomédicas 'Alberto Sols', Spanish  
16 National Research Council (CSIC)-Autonomous University of Madrid (UAM) and IdiPAZ,  
17 CIBERONC, Madrid, Spain.

18 <sup>4</sup>Department of Pathology, Institut Mar d'Investigacions Mèdiques, Universitat Autònoma de  
19 Barcelona, CIBERONC, Barcelona 08003, Spain.

20 <sup>5</sup>Department of Oncology, Institut Mar d'Investigacions Mèdiques, CIBERONC, Universitat  
21 Pompeu Fabra, Barcelona 08003, Spain.

22 <sup>6</sup>Group of Biomedical Genomics, Institut de Recerca Biomedica (IRB), Barcelona 08028, Spain.

23 <sup>7</sup>Biostatistics and Data Management Platform, IDIBAPS, Hospital Clínic, Biostatistics Unit.  
24 Faculty of Medicine, Universitat Autònoma de Barcelona, Barcelona, Spain.

25  
26  
27 † Both first co-authors

28 \* Corresponding authors

29  
30 Mail to [abigas@imim.es](mailto:abigas@imim.es); [lespinosa@imim.es](mailto:lespinosa@imim.es)

31  
32  
33  
34  
35

36 **Abstract:**

37 Current therapy against colorectal cancer is based on DNA-damaging agents that eradicate  
38 highly proliferative malignant cells. Whether sublethal chemotherapy affects tumor cell behavior  
39 and impacts on patient outcome is primarily unstudied. We now show that sublethal  
40 chemotherapy imposes a quiescent-like state to p53 wildtype human colorectal cancer (CRC)  
41 cells that is linked to the acquisition of a fetal phenotype downstream of YAP1, similar to that  
42 observed after intestinal damage. CRC cells displaying this fetal phenotype exhibit tumor-  
43 initiating activity comparable to untreated cells but superior metastatic capacity. Notably, nuclear  
44 YAP1 accumulation, or detection of the fetal signature in tumors predict poor prognosis in CRC  
45 patients carrying p53 wildtype tumors.

46  
47 Collectively, our results uncover a potential adverse response of tumor cells to suboptimal  
48 chemotherapy, and identify nuclear YAP1 and fetal conversion of colorectal tumors as  
49 biomarkers for prognosis and therapy prescription.

50

51

52 **Statement of significance:**

53 Chemotherapy induces a quiescent-like phenotype to colorectal cancer cells that is linked to the  
54 acquisition of a YAP1-dependent fetal signature. Notably, this signature is predictive of patient  
55 outcome in different cohorts of human colorectal cancer.

56

57

58

59

60 **INTRODUCTION**

61

62 Colorectal cancer (CRC) remains the second leading cause of cancer-related death, which  
63 highlights the need for novel therapies focused on treatment of advanced disease. Treatment of  
64 localized CRC currently involves surgery, radiotherapy and/or chemotherapy (CT) (mainly 5-FU  
65 or capecitabine and oxaliplatin in the neoadjuvant or adjuvant setting), while CT (5-FU,  
66 oxaliplatin and irinotecan) still represents the main backbone of treatment for advanced CRC. In  
67 general, classical CT agents are designed to eradicate tumors by inducing DNA damage in highly  
68 proliferative cells leading to cell death (reviewed in (1)). However, most tumors contain a  
69 variable proportion of quiescent cells, including cancer stem cells, that are refractory to these  
70 agents thus contributing to tumor relapse and metastasis (2). In agreement with this notion, the  
71 presence of intestinal stem cell (ISC) signatures in tumors is predictive of poor prognosis in  
72 patients (3). Even after adequate treatment, around 25-30% of CRC patients in the less aggressive  
73 stage II tumors and up to 30-50% in stage III relapse and most of them eventually die (data from

74 the American Cancer Society). There is growing evidence that therapeutic strategies that  
75 potentiate the effect of DNA damaging agents may provide the base for more effective  
76 combination therapies (4,5).

77 Even when therapy fails to totally eradicate tumors, cancer cells receiving sublethal doses of  
78 therapeutic agents can acquire a senescent phenotype, characterized by high levels of the cell  
79 cycle inhibitors p16 and p21, cessation of proliferation and presence of a senescent-associated-  
80 secretory-phenotype (SASP) that effectively delays disease progression (6). However, senescent  
81 cells may still contribute to tumor progression as a source for relapse or metastasis, or by the  
82 secretion of pro-tumorigenic factors (reviewed in (7–9)). To date, there is an almost absolute lack  
83 of patient-based data to firmly establish the contribution of sub-lethal chemotherapy to patient  
84 outcome.

85 Recently, it was shown that fetal reprogramming of intestinal cancer cells induced by YAP1 led to  
86 tumor and metastasis suppression in the *Apc*<sup>-/-</sup>; *Kras*<sup>G12D</sup>; *p53*<sup>-/-</sup> murine cancer model (10). We  
87 here show that p53 wildtype CRC patient-derived organoids (PDO)s treated with low doses of  
88 CT acquire a quiescent-like phenotype that is associated with YAP1-dependent fetal ISC  
89 conversion. These persistent quiescent-like (PQL) cells display high in vitro and in vivo tumor  
90 and metastasis initiating capacity, and we identified a restricted fetal ISC signature that is present  
91 in PQL cells and in a subset of untreated CRC tumors. Presence of this fetal signature or  
92 detection of nuclear YAP1 in tumors predicts poor disease outcome at stages II and III, in  
93 particular in CRC patients carrying tumors with functional p53 signaling.

94

95

96

97

98

99

100

101

102

103

104

105

106

107

108

109

## 110 RESULTS

111

### 112 **Low-dose CT treatment of colorectal cancer PDOs induces a non-senescent quiescent** 113 **phenotype in the absence of sustained DNA damage**

114 To investigate the mechanisms that impose therapy resistant in cancer patients, we treated CRC  
115 PDOs with serial dilutions of the first-line CT agents 5-FU+Iri. Although high 5-FU+Iri.  
116 concentrations led to eradication of most PDO cells, we defined IC<sub>20</sub> and IC<sub>30</sub> as the 5-FU+Iri.  
117 doses that reduced cell viability by 20 and 30% after 72 hours of treatment, which were specific  
118 for each PDO (Figure 1A and Supplementary Table S1). Microscopy analysis of PDO5 (*TP53*  
119 WT) treated at IC<sub>20</sub> and IC<sub>30</sub> did not reveal obvious signs of cell death, but we noticed a dose-  
120 dependent growth arrest in all PDOs tested, that continued for at least 2 weeks after drug washout  
121 (Figures 1B and C, and S1A). Growth arrest was associated with inhibition of cell proliferation  
122 as determined by IHC analysis of ki67 (Figure 1D and S1B) and the reduced number of cells in S  
123 phase with accumulation in G<sub>0</sub>/G<sub>1</sub> and G<sub>2</sub>/M (Figure S1C), the latter probably corresponding to  
124 cells not undergoing cytokinesis (11,12). By fluorescent in-situ hybridization (FISH) and DAPI  
125 staining combined with IF of the membrane marker EPHB2, we demonstrated the absence of  
126 polyploid or multinucleated cells, respectively, following IC<sub>30</sub> treatment (Figure S1D, E, F).

127 We determined whether IC<sub>20</sub> and IC<sub>30</sub> treatments inflicted a senescent phenotype to PDO5 cells  
128 by evaluation of senescence-associated (SA)-β-Galactosidase activity by flow cytometry (Figure  
129 1E) and IHC (Figure S1G). Cells that persisted after IC<sub>20</sub> or IC<sub>30</sub> were not senescent, in contrast  
130 with cells treated at IC<sub>60</sub> for 72 hours (Figure 1E). Accordingly, addition of the senolytic agent  
131 dasatinib (13) did not potentiate the growth inhibition imposed by IC<sub>20</sub> and IC<sub>30</sub> 5-FU+Iri. but  
132 enhanced the effect of IC<sub>60</sub> 5-FU+Iri. treatment (Figure 1F). Moreover, we did not detect  
133 apoptotic PDO5 cells after IC<sub>30</sub> treatment as determined by cleaved-caspase 3 staining (Figure  
134 S1H) and Annexin V staining (Figure S1I). We studied the possibility that cell cycle arrest after  
135 IC<sub>20</sub> and IC<sub>30</sub> treatment was linked to sustained DNA damage. Comet assay (Figures 1G) and  
136 WB analysis of the γH2A.X marker (Figure 1H) in PDO5 revealed a dose-dependent  
137 accumulation of DNA damage starting at 1-3 hours with a maximum at 24 hours. Importantly,  
138 DNA damage was undetectable at 72 hours after IC<sub>20</sub> and IC<sub>30</sub> treatment, but clearly present in  
139 IC<sub>60</sub>-treated PDO5 (Figure 1H and 1I). In contrast, PDO4 and PDO8 cells carrying mutated *TP53*  
140 exhibited high amounts of DNA damage following IC<sub>20</sub> and IC<sub>30</sub> 5-FU+Iri. treatment that lasted  
141 for at least 72 hours (Figure 1J), in agreement with the higher growth inhibition of *TP53* mutant  
142 PDOs after CT washout (Figure S1A).

143 These results indicate that p53 wildtype cancer cells that persisted after low CT acquire a  
144 quiescent-like phenotype, hereafter referred as PQL (for persistent quiescent-like), in the absence  
145 of sustained DNA damage.

146

### 147 **CT-induced PQL cells display fetal intestinal stem cells (feISC) characteristics**

148 Sublethal CT treatment has been linked to the acquisition of specific stem cell signatures in B-  
149 cell lymphoma (8) and intestinal cancer (14). To study the transcriptional changes associated

150 with the PQL phenotype, we performed RNA sequencing (RNA-seq) of control, IC<sub>20</sub>- and IC<sub>30</sub>-  
151 treated PDO5 cells. Bioinformatic examination of differentially expressed genes (DEGs)  
152 (Supplementary Table S2) showed an almost perfect correlation of gene expression changes  
153 between pairwise comparisons (IC<sub>20</sub> vs. untreated and IC<sub>30</sub> vs. untreated) ( $p < 2.2 \times 10^{-16}$ ,  $R = 0.974$ )  
154 (Figure S2A). Gene Set Enrichment Analysis (GSEA) uncovered p53 as the main activated  
155 pathway in PQL cells (Figure 2A), which was confirmed by WB analysis (Figure 2B), qPCR  
156 (Figure 2C) and ChIP assay (Figure S2B) of canonical p53 targets. DEGs genes also clustered in  
157 the NF- $\kappa$ B, epithelial-to-mesenchymal transition (EMT) and interferon gamma (IFN $\gamma$ ) pathways  
158 (Figure 2A) that have been associated with inflammatory response and stemness (15–19).  
159 Unexpectedly, DEG in our analysis negatively correlated with a canonical ISC signature (Muñoz  
160 et al., 2012) (Figure 2D). More in-depth analysis showed a mixed pattern of genes up-regulated  
161 such as *LY6D* and *YAP1*, which are instrumental in the fetal ISC (feISC) after intestinal injury  
162 (10,19–21), and down-regulated such is the case of canonical adult ISC markers *LGR5* and  
163 *EPHB2* (Figure 2E). Accordingly, GSEA indicated a significant correlation between the CT-  
164 induced signature and the transcriptional program associated with fetal ISC conversion (21)  
165 (Figure 2F and 2G).

166

167

### 168 **The feISC signature shows a coordinate expression in human CRC and is dependent of** 169 **functional p53**

170 We asked whether CT-induced feISC signature was present in untreated human tumors.  
171 Computational analysis of the Marisa (22) (GSE39582), Jorissen (23) (GSE14333) and TCGA  
172 (TCGA Portal) CRC datasets using CANCERTOOL (24) indicated that many genes of the  
173 signature were distributed in clusters of coordinate expression in untreated tumors (with either  
174 positive or negative correlation) (supplementary Table S3), which we integrated in a new cluster  
175 containing 28 plus 8 genes that were either upregulated (28up) or downregulated (8down) in CT-  
176 treated PDOs and fetal-converted ISCs (Figure S3A). This new 28up+8down-feISC gene  
177 signature was present in Marisa (Figure 3A), Jorissen and TCGA CRC cohorts (not depicted).  
178 We confirmed regulation of several genes of the 28up+8down-feISC signature by RT-qPCR  
179 (Figure 3B) and WB analysis (Figure 3C) of IC<sub>20</sub> 5-FU+Iri.-treated PDO5. Activation of fetal  
180 genes following CT treatment was comparably observed in the *TP53* WT PDO66 (Figure 3D)  
181 but significantly impaired in the hypomorphic *TP53* mutant PDO4 (Figure 3E). We confirmed  
182 the p53 dependency of the feISC signature through generation by CRISPR-Cas9 of PDO5 pools  
183 with variable degrees of p53 KO (Figure S3B). RT-qPCR analysis revealed that PDO5 KO#3  
184 with the highest p53 KO efficiency showed lower activation of 28up-feISC genes after 5-FU+iri.  
185 IC<sub>20</sub> treatment (Figure 3F). However, we only detected slight differences in the protein levels of  
186 randomly selected fetal markers when comparing CRC cell lines carrying WT or mutant p53,  
187 with the latter showing a massive accumulation of the DNA damage marker  $\gamma$ H2A.X after CT  
188 (Figure 3G). ChIP-seq assay of 5-FU+Iri. IC<sub>20</sub>-treated PDO5 cells indicated that only 3 genes in  
189 the 28up-feISC signature, *PLK2*, *PHLDA3* and *GSN* genes were direct p53 targets (Figure

190 S3C), consistent with previously published data (25). These results suggested that additional  
191 transcription factor/s govern fetal ISC conversion by CT.

192

193 We also determined whether untreated tumors carrying the 28up+8down-feISC signature were  
194 restricted to a specific molecular cancer subtype. 74% of tumors with the 28up+8down-feISC  
195 signature were categorized as CSM4, based on the classification by Guinney and collaborators  
196 (26) (Figure 3H), which is characterized by upregulation of epithelial to mesenchymal transition  
197 gene signatures, TGF $\beta$  signaling, stromal infiltration and poorer patient prognosis. In contrast,  
198 28up-low+8down-high tumors were primarily ascribed to the more canonical Wnt and Myc-  
199 driven CMS2 subtype. We studied whether the feISC signature of untreated tumors was  
200 expressed in the epithelial cancer cells or primarily contributed by the stromal component.  
201 Analysis of single cell RNA-seq data from Lee and collaborators (27) demonstrated that feISC  
202 genes are expressed in the epithelial cancer cells, particularly in states 1, 5 and 6 that are all  
203 associated with the secretory and migratory pathways (Figure 3I).

204

205 These results indicate that sublethal CT induces a fetal signature, which is dependent on the  
206 presence of a functional p53 pathway. This feISC signature is also expressed in a coordinate  
207 manner in untreated human CRC tumors, in particular in tumors of the CMS4 subtype from  
208 Guinney and collaborators, and the secretory and migratory epithelial states 1, 5 and 6 from Lee  
209 and collaborators.

210

211

### 212 **PQL cancer cells display increased in vitro and in vivo tumor initiation capacity.**

213 It was recently shown that fetal ISC conversion imposed by YAP1 activation (induced by  
214 deletion of the Hippo kinases LATS1/2) in the *Apc*<sup>-/-</sup>; *Kras*<sup>G12D</sup>; *p53*<sup>-/-</sup> murine intestinal tumor  
215 cells results in tumor and metastasis suppression (10). Thus, we studied whether p53 proficient  
216 PQL cells, which display a consistent activation of a feISC signature, preserved tumor initiation  
217 capacity (TIC) of untreated cancer cells. We seeded 300 single cells from untreated or 5-FU+Iri.  
218 IC<sub>20</sub> or IC<sub>30</sub>-treated PDO5, as indicated. We found that CT pretreatment of PDO5 cells did not  
219 affect their TIC in vitro compared with untreated cells, as indicated by the equivalent number of  
220 spheres generated (Figures 4A, upper panel), but imposed a dose-dependent reduction of spheres  
221 diameter (Figures 4A, lower panel), consistent with their low proliferation rates. In contrast, 5-  
222 FU+Iri. pretreatment (IC<sub>20</sub>) of *TP53* mutant PDO4 and PDO8 cells resulted in TIC abrogation  
223 (Figure 4B), which is in agreement with the massive accumulation of DNA damage detected in  
224 comet assays (see Figure 1J). Considering that TIC activity in PDO5 could be driven by the  
225 fraction of cells which still undergo replication after IC<sub>20</sub> and IC<sub>30</sub> treatment (Figure 1D, S1B and  
226 S1C), we next compared the TIC in vitro of the general population and specifically the quiescent  
227 cells. For this, we generated *TP53* WT PDO5 carrying a doxycycline-inducible histone-GFP  
228 reporter that has been previously demonstrated to label the quiescent tumor population after  
229 doxycycline withdrawal (28). Upon 6 days of doxycycline treatment, PDO5 cells were treated



230 with 5-FU+Iri. for 72 hours and, after 2 weeks of doxycycline washout, analyzed by flow  
231 cytometry and GFP<sub>high</sub> and GFP<sub>low</sub> were sorted (S4A). We found that sorted GFP<sub>high</sub>, which  
232 represents the quiescent population of CT-treated cells, displayed identical capacity for organoid  
233 generation as GFP<sub>high</sub> plus GFP<sub>low</sub> cells indicating that TIC activity is retained in the PQL  
234 population.

235 We next studied the in vivo tumorigenic capacity of IC<sub>20</sub> and IC<sub>30</sub> pretreated PDO5 cells using  
236 two complementary strategies. Firstly, we performed intracardiac injection of 40,000 single  
237 PDO5 cells (untreated, IC<sub>20</sub> or IC<sub>30</sub> pretreated) labelled with firefly luciferase into NOD-SCID-  
238 gamma (NSG) immunocompromised mice. Mice were analyzed weekly using bioluminescence  
239 (BLI) to monitor metastatic growth using the IVIS animal imaging system (Figure 4C). We  
240 found that PDO5 treated with 5-FU+Iri. displayed a slightly superior metastatic capacity than  
241 untreated cells. Specifically, 4 of 8 mice transplanted with untreated PDO5 cells contained  
242 metastatic lesions at week 15 after transplantation. Importantly, 4 of 6 mice transplanted with  
243 IC<sub>20</sub>-treated cells and 5 of 6 mice with IC<sub>30</sub>-treated cells showed visible metastasis 15 weeks  
244 after injection (Figure 4D and 4E). Secondly, we inoculated equivalent numbers of untreated,  
245 IC<sub>20</sub> and IC<sub>30</sub> pretreated PDO5 cells in the cecum of nude mice. Tumor growth was assessed by  
246 palpation weekly and animals sacrificed synchronously 70 days after transplantation. We found  
247 that untreated, IC<sub>20</sub> and IC<sub>30</sub>-treated PDOs all generated tumors in the site of inoculation, being  
248 IC<sub>20</sub> and IC<sub>30</sub>-treated derived tumors being much smaller than those arising from untreated  
249 controls (Figure 4F), as expected. Importantly IC<sub>20</sub> and IC<sub>30</sub>-treated PDO cells displayed a  
250 significantly higher ability to generate intraperitoneal implants when compared with untreated  
251 tumor cells (Figure 4G and 4H). Still, we detected a reduction in the proliferation capacity of  
252 CT-treated PDO5 cells as determined by IHC analysis of the proliferation marker ki67 (Figure  
253 4I).

254 These results indicate that *TP53* WT CRC cells treated with low doses of 5-FU+Iri. show  
255 reduced capacity to proliferate in vitro and in the primary tumors, but display comparable TIC as  
256 untreated cells in vitro and higher metastatic activity in vivo.

### 257 **The CT induced feISC signature is predictive of reduced disease-free survival in *TP53* WT** 258 **tumors**

259 We studied the possibility that the presence of the feISC signature in untreated CRC tumors was  
260 associated with patients' outcome. To this aim, we analyzed the predictive capacity of the  
261 28up+8down-feISC gene signature in the Marisa, Jorissen and TCGA CRC data sets. The global  
262 28up+8down-feISC signature was sufficient to demarcate at least 2 subsets of patients in either  
263 data set (Figure 5A and Supplementary Table S4), with the group with highest 28up and lowest  
264 8down-feISC levels displaying the poorest disease-free-survival (Figure 5B). A more detailed  
265 analysis of the Marisa data set demonstrated that this signature was significantly associated with  
266 tumor relapse in patients at stages II (n=264) (p=0.041) (Figure 5C) and II+III (n=469)

267 (p=0.0033) (Figure 5C and 5D), and imposed a trend towards poor prognosis at stage IV (n=60)  
268 (Figure 5E).

269 Since presence of functional p53 defined feISC conversion and TIC maintenance (see Figures  
270 3F, 4A and 4B), we explored the possibility that *TP53* status determined the prognosis value of  
271 28up+8down-feISC signature in CRC patients. Stratification of Marisa (Figure 5F) and TCGA  
272 (Figure S5A) patients according to *TP53* status did not have prognosis value by itself, but  
273 determines the prognosis value of 28up+8down-feISC signature (Figures 5G and Figure S5B).  
274 Because 28up+8down-feISC tumors are mainly included in the worst prognosis CMS4, we tested  
275 whether this feISC signature represents an independent prognosis factor inside this molecular  
276 subtype. Our results indicate that the 28up+8down-feISC signature increased the risk of relapse  
277 in patients within the CMS4 group (Figure 5H).

278 Finally, we explored the possibility of identifying a simplified signature derived from the  
279 28up+8down-feISC with comparable prognosis value in cancer, which would facilitate its  
280 implantation in the clinical practice. We scored genes by their coordinate expression in the 3  
281 CRC datasets analyzed (supplementary Table S5). Then we evaluated the added value of single  
282 genes to the simplest signature composed by the highest scored 28up plus the highest scored  
283 8down-feISC gene. We uncovered a minimal 5up+3down-feISC signature that shared coordinate  
284 expression in tumors (Figure S5C) and stratified patients with poor prognosis in all tested CRC  
285 cohorts (Marisa, p=0.00003; Jorissen, p=0.0002; TCGA, p=0.037) (Figure S5D) including  
286 patients carrying tumors at stage II and II-III (Figure 5I).

287  
288

### 289 **Acquisition of feISC by CT treatment is linked to and dependent on YAP1 activation**

290 We investigated whether feISC conversion of CRC cells after CT treatment was YAP1  
291 dependent, as previously found in mouse models (10,20). WB analysis of PDO5 cells (Figure  
292 6A) and various CRC cell lines (Figure 6B) showed increased YAP1 expression after 5-FU+Iri.  
293 treatment, that was restricted to cells carrying WT *TP53* (Figure 6B). We detected accumulation  
294 of nuclear (active) YAP1 in IC<sub>20</sub> and IC<sub>30</sub>-derived PDO5 tumors at 2 months after implantation  
295 in mice (Figure 6C). Next, we studied whether YAP1 activity was required for transcriptional  
296 induction of feISC genes by CT. Incubation of PDO5 cells with the YAP1 inhibitor verteporfin  
297 precluded induction of all tested feISC genes following IC<sub>20</sub> 5-FU+Iri. treatment (Figure 6D).  
298 Similarly, IC<sub>20</sub> 5-FU+Iri. treatment of Ls174T CRC cells led to an increase in YAP, SERPINH1  
299 and TSPAN4 protein levels, which was abrogated by verteporfin (Figure S6A). Importantly,  
300 verteporfin alone, but more effectively in combination with CT, promotes tumor cell death in  
301 both *TP53* WT and *TP53* mutant PDO cells (Figures 6E). In addition, we observed that IC<sub>20</sub> and  
302 IC<sub>30</sub> pre-treated PDO cells show increased resistance to subsequent CT treatment (Figure S6B)  
303 that was prevented by addition of verteporfin (Figure 6F) strongly suggesting that combination  
304 of CT plus YAP1 inhibitors may represent a suitable therapeutic strategy for eradicating CRC  
305 tumors showing fetal ISC conversion.

306



307 Then, we performed IHC analysis of ki67 (to determine the proliferation status) and YAP1 in 62-  
308 paired human CRC tumors collected at diagnosis (biopsy) and after DNA damaging-based  
309 neoadjuvant treatment (surgery). Whereas some tumors exhibited similar proliferation rates after  
310 treatment, as determined by Ki67 staining (type 1), we identified a large subset of tumors that  
311 displayed reduced proliferation with no morphological evidences of senescence (type 2), such as  
312 enlarged nuclei or expression of the senescence marker p16 (Figure S6C), which are observed in  
313 scarce tumors at surgery (type 3) (Supplementary Table S6). We failed to detect differences in  
314 patient prognosis when comparing type 1 and type 2 tumors that are readily observed in patient  
315 carrying type 3 tumors (no events of relapse in the follow-up period) (Figure S6D). Interestingly,  
316 we detected nuclear YAP1 in few epithelial cells of untreated tumors, which was massively  
317 increased in neoadjuvant treated tumors independently of the proliferation status (Figure 6G and  
318 Supplementary Table S6), associated with expression of the feISC markers S100A4 and  
319 SERPINH1 (Figure 6H).

320 Since the number of samples in the studied cohort was insufficient to evaluate the clinical impact  
321 of nuclear YAP1 accumulation, we performed IHC analysis of YAP1 in a tissue microarray  
322 containing 196 different human CRC samples in triplicates with available clinical data. We  
323 determined the H score of nuclear YAP1 (as intensity multiplied by percent of positive tumor  
324 cells) in the triplicates and stratified the CRC patients accordingly. Considering the mean value  $\pm$   
325 0.2 standard deviations of the H-score, we observed a trend towards poor prognosis in the group  
326 with higher nuclear YAP1 (disease-free survival:  $p=0.26$ ;  $HR=1.38$ , not depicted) that increased  
327 when considering mean value  $\pm 0.4$  s.d. ( $p=0.12$ ;  $HR=1.58$ , not depicted). Importantly, nuclear  
328 YAP1 levels reached statistical significance when considering the mean value  $\pm 0.6$  standard  
329 deviations ( $p=0.039$ ;  $HR=1.97$ ) (Figure 6I and 6J).

330

331 Together our data indicate that sublethal CT promotes the conversion of tumor cells into a fetal  
332 ISC phenotype that favors cancer progression and metastasis. Moreover, we uncover a CT-  
333 induced 28up+8down-feISC signature and its derivative the 5up+3down-feISC signature, which  
334 are present in a subset of untreated CRC tumors and has prognosis value in the context of  
335 functional p53. Finally, we demonstrated the higher efficacy of CT in combination with YAP1  
336 inhibitors for eradication of *TP53* WT tumors, and the possibility of using nuclear YAP1  
337 detection to identify patients that could benefit from this therapeutic strategy.

338

339

## 340 **DISCUSSION**

341

342 CT is the current treatment for advanced and metastatic colorectal tumors. However, in a percent  
343 of cases tumor cells that escape from death imposed by therapeutic drugs (by efficient drug  
344 clearance, effective DNA repair or due to reduced accessibility of the drugs to specific tumor  
345 areas) can acquire a dormant phenotype that provides superior resistance to subsequent DNA  
346 damaging-based treatment based on their less proliferative state. In the present study we have  
347 shown that sublethal doses of CT impose a non-senescent and non-proliferating phenotype to  
348 cancer cells, in the absence of persistent DNA damage. Although discriminating between  
349 senescence and quiescence is not essential, since senescence was demonstrated to be reversible  
350 depending on the alternative use of p53/p21 (reversible) or p16/RB (irreversible) (29) leading to  
351 increased tumor stemness (8), we unequivocally observed that CT-treated cells display a  
352 quiescence-like state in the absence of a robust senescence phenotype. Importantly, PQL cancer  
353 cells can efficiently escape from dormancy following in vivo transplantation, as it is shown in the  
354 xenograft experiments, displaying a superior capacity to escape from the site of implantation.  
355 This is in agreement with the higher metastatic potential observed for CT treated cells and in line  
356 with previously studies showing that dormant cell populations in primary human CRC cells still  
357 retains tumor propagation potential (30) and that specific subpopulations of cancer cells  
358 reversibly enter a quiescent state and exhibit increased tumorigenic potential in response to CT  
359 (31).

360

361 Our transcriptomic studies revealed that the dynamics associated with the acquisition of the PQL  
362 phenotype rely downstream of p53 and p21 signaling. It has long been established that the key  
363 regulatory proteins that mediate cell cycle block include p53, p21 and p16, among others  
364 (reviewed in (32)). The finding that the cancer cells carrying dysfunctional p53 did not acquire  
365 the PQL phenotype but display massive amounts of DNA damage may explain the results  
366 obtained by Cheung and collaborators indicating that YAP1 activation acts as tumor suppressor  
367 in p53 depleted tumors (10). In this context, our results are of particular relevance since they  
368 clarify the functional contribution of YAP1 as driver of fetal conversion and metastasis in p53  
369 WT colorectal cancer, which is in agreement with previous reports (reviewed in (33)). In the  
370 same direction, it has been recently demonstrated that tumor cells that resist prolong CT acquire  
371 an embryonic-like and quiescent state that facilitates therapeutic resistance (34). We propose that  
372 functional p53 through p21 upregulation imposes a stop in proliferation when exposed to low CT  
373 doses that allow cells to recover under specific conditions, whereas cell depleted of functional  
374 p53 continue proliferating thus accumulating irreparable damage and apoptotic death. This  
375 cellular response represents, in fact, a double-edge sword since it can impose specific outcomes  
376 depending on the *TP53* status and the heterogeneity of cancer cells. In this sense, it was  
377 demonstrated that 5-FU treatment induced cell dormancy and epithelial to mesenchyme

378 transition in lung cancer cells, associated with p53 accumulation (35). Further experiments  
379 genetically deleting YAP1 in *TP53* WT cells and preclinical assays using YAP1 inhibitors are  
380 required to definitively demonstrate the possibility of using specific protocols to combat fetal-  
381 converted tumors.

382  
383 Remarkably, we have shown that the sublethal CT-induced feISC signature is already present in  
384 a subset of untreated tumors at diagnosis in several CRC cohorts. It is tempting to speculate that  
385 extrinsic factors or non-cancer cells present in the tumor, such as inflammatory cells, may induce  
386 the upstream regulators of this signature (i.e., TGF $\beta$  signaling) thus leading to the acquisition of  
387 PQL traits in the absence of treatment. In agreement with this idea, tumors carrying the  
388 28up+8down-feISC signature are primarily included in the CMS4 CRC subtype identified by  
389 Guinney and collaborators (26) and characterized by stromal infiltration and TGF $\beta$  signaling.  
390 We speculate that TGF $\beta$  or additional cytokines derived from the tumor stroma may impose a  
391 YAP1-dependent feISC signature, which is in agreement with the previous demonstration that  
392 TGF $\beta$  promotes YAP1 signaling by facilitating the degradation of the negative regulator of the  
393 pathway RASSF1A (36). To recognize patients with higher probability of recurrence among  
394 those of uncertain prognosis (stages II-III) by the analysis of a reduced feISC signature can be  
395 clinically relevant as it may suggest more aggressive treatments or to intensify patient follow-up.  
396 Additionally, targeting the upstream signals imposing PQL/feISC acquisition pharmacologically  
397 (i.e. YAP1 inhibitors) or using combination treatments that effectively eradicate quiescent tumor  
398 cell populations (i.e. CT plus inhibitors of the NHEJ repair pathway) appear as interesting  
399 therapeutic options.

400  
401 On the other hand, we identified IFN signaling in the analysis of CT-induced genes associated  
402 with PQL acquisition, which is in agreement with the essential function of IFN pathway in the  
403 conversion of adult stem cells into a fetal ISC phenotype (19). Conversion of adult into fetal ISC  
404 had already been identified as part of the process of tissue regeneration after helminths infection  
405 (19) or in the Dextran Sulfate Sodium colitis model (20). Thus, our results reinforce the concept  
406 that tumor development is partially mimicking the tissue regeneration process.

407  
408 Our findings linking fetal ISC conversion poor CRC prognosis are partially in contrast with data  
409 indicating the prognosis factor of the adult ISC signature, including *Lgr5* (3). Nevertheless, it has  
410 been recently demonstrated that *Lgr5* and other adult ISC markers are temporary lost from cells  
411 seeding metastases, and subsequently recovered (due to cellular plasticity) to allow metastasis  
412 establishment (37) and most data indicating the requirement for adult *Lgr5*+ ISC in metastasis  
413 seeding have been obtained on p53-deficient tumor cells (10,38). Interestingly, Batlle's group  
414 recently identified a different contribution of *Lgr5*+ cells in PDOs carrying mutated or WT *TP53*  
415 (higher in mutant *TP53*) (39) thus opening the possibility that dependence on adult *Lgr5*+ ISCs  
416 for cancer progression is linked to *TP53* deficiency, which should be further investigated.  
417 Independently on the mechanisms underlying conversion of adult into fetal ISCs (induced by CT

418 or signals derived from the tumor stroma), we have here identified a restricted genetic signature  
419 that is present in a subset of tumors that are mostly included in the CMS4 (the cancer stem cell  
420 and poor prognosis subtype) but clearly differ from that of adult ISCs.

421

422 From a clinical perspective, uncovering genetic signatures that are predictive of recurrence in a  
423 group of patients with uncertain projection (stages II and III) will represent a powerful tool for  
424 diagnosis refinement. In this direction, we are currently setting up the protocols for early  
425 detection of PQL/feISC cells in stages II-III tumors at diagnosis. As mentioned, anticipating the  
426 presence of this adverse phenotype in tumors would allow exposing selected groups of patients  
427 to alternative therapeutic procedures that could be refined with the discovery of the mechanisms  
428 imposing fetal SC conversion in cancer.

429

430

431

## 432 **METHODS**

433

### 434 **Study design**

435 The goal of this study was to determine in patient-derived data that chemotherapy positively or  
436 negatively impact on colorectal cancer progression in case of incomplete remission. Study of  
437 sublethal doses of DNA-damaging agents was performed in several patient-derived organoids  
438 and human cell lines to demonstrate its broad effects. By taking advantage of public colorectal  
439 tumor databases, the expression profiling of genetic signatures was accomplished. The numbers  
440 of experiments, biological replicates, and sample sizes for each database are outlined in the  
441 figure legends.

442

### 443 **Reagents, antibodies and software**

444 A table of the source of all reagents, antibodies, kits, cell lines, chemicals and software is  
445 included (Table S8).

446

### 447 **Animal studies**

448 Fragments of human colorectal tumors obtained from Parc de Salut MAR Biobank  
449 (MARbiobank) with the informed consent of patients and following all recommendations of  
450 Hospital del Mar' Ethics Committee, the Spanish regulations, and the Helsinki declaration's  
451 Guide were transplanted and expanded in the cecum of nude mice as orthoxenografts. To  
452 perform tumor-initiating assays, two approaches were used. Firstly, intracardiac injection of  
453 40.000 CT (n=8) and IC<sub>20</sub> (n=7) or IC<sub>30</sub> (n=6) -treated PDO5 cells carrying a luciferase reporter  
454 to NSG mice was performed. For checking that the injection was performed correctly, after  
455 injection animals were anesthetized and were given 100µl of substrate D-luciferin at 15 mg/ml  
456 by intraorbital injection. Bioluminescent imaging was performed placing the animals into the  
457 IVIS Lumina III In Vivo Imaging System (PerkinElmer). Images were recorded with an  
458 exposure time of 2 minutes and were taken every week. Quantification was done using Living  
459 Image® software (PerkinElmer). Secondly, equivalent amounts of disaggregated patient-derived  
460 organoids (PDOs), previously treated as indicated below, were implanted as orthoxenografts.  
461 Follow-up of the growing tumors was done by palpation and animals were sacrificed when  
462 controls developed tumors of around 2 cm of diameter. In all our procedures, animals were kept  
463 under pathogen-free conditions, and animal work was conducted according to the guidelines  
464 from the Animal Care Committee at the Generalitat de Catalunya. The Committee for Animal  
465 Experimentation at the Institute of Biomedical Research of Bellvitge (Barcelona) approved these  
466 studies.

467

### 468 **Patient-derived organoids and culture conditions**

469 Samples from patients were kindly provided by MARBiobank and IdiPAZ Biobank, integrated  
470 in the Spanish Hospital Biobanks Network (RetBioH; [www.redbiobancos.es](http://www.redbiobancos.es)). Informed consent  
471 was obtained from all participants and protocols were approved by institutional ethical  
472 committees. For patient-derived organoids (PDOs) generation, primary or xenografted human

473 colorectal tumors were disaggregated in 1.5 mg/mL collagenase II and 20 µg/mL hyaluronidase  
474 after 40min of incubation at 37°C, filtered in 100 µm cell strainer and seeded in 50 µL Matrigel  
475 in 24-well plates, as previously described (40). After polymerization, 450 µL of complete  
476 medium was added (DMEM/F12 plus penicillin (100 U/mL) and streptomycin (100 µg/mL), 100  
477 µg/mL Primocin, 1X N2 and B27, 10mM Nicotinamide; 1.25 mM N-Acetyl-L-cysteine, 100  
478 ng/mL Noggin and 100 ng/mL R-spondin-1, 10 µM Y-27632, 10 nM PGE2, 3 µM SB202190,  
479 0.5 µM A-8301, 50 ng/mL EGF and 10 nM Gastrin I). Tumor spheres were collected and  
480 digested with an adequate amount of trypsin to single cells and re-plated in culture. Cultures  
481 were maintained at 37°C, 5% CO<sub>2</sub> and medium changed every week. PDOs were expanded by  
482 serial passaging and kept frozen in liquid Nitrogen for being used in subsequent experiments.  
483 Mutations identified in the PDOs are listed in Supplementary Table S1.

484

#### 485 **Cell lines**

486 CRC cell lines HCT116 and Ls174T (*KRAS* mutated and *TP53* WT), SW480 (*KRAS* and *TP53*  
487 mutated) and HT29 (*BRAF* and *TP53* mutated) were obtained from the American Type Culture  
488 Collection (ATCC, USA). All cells were grown in Dulbecco's modified Eagle's medium  
489 (Invitrogen) plus 10% fetal bovine serum (Biological Industries) and were maintained in a 5%  
490 CO<sub>2</sub> incubator at 37°C. 5-FU+Iri. concentrations that reduced 30% of each cell growth were as  
491 follows: HCT116, 0.01 µg/mL 5-FU and 0.004 µg/mL Iri.; Ls174T, 0.025 µg/mL 5-FU and 0.01  
492 µg/mL Iri.; SW480, 0.28 µg/mL 5-FU and 0.11 µg/mL Iri.; HT29, 0.33 µg/mL 5-FU and 0.13  
493 µg/mL Iri.

494

#### 495 **Human colorectal cell lines**

496 Formalin-fixed, paraffin-embedded tissue blocks of gastrointestinal tumor samples, from patients  
497 at diagnosis and after neoadjuvant therapy at the time of surgery, were obtained from Parc de  
498 Salut Mar Biobank (MARBiobank, Barcelona). Samples were retrieved under informed consent  
499 and approval of the Tumor Bank Committees according to Spanish ethical regulations and the  
500 guidelines of the Declaration of Helsinki. Patient identity for pathological specimens remained  
501 anonymous in the context of this study. Patient data was collected (Supplementary Table S6).  
502 IHC analyses were performed as described below.

503

504

#### 505 **Patient-derived organoids viability assays**

506 600 single PDO cells were plated in 96-well plates in 10 µL Matrigel with 100 µL of complete  
507 medium. After 6 days in culture, growing PDOs were treated with combinations of 5-FU+Iri. for  
508 72 hours at the concentrations that reduce a 20 and 30% of the cell growth (IC<sub>20</sub> and IC<sub>30</sub>,  
509 respectively), which are specific for each PDO as described in Supplementary Table S1. After 72  
510 hours of treatment, we changed to fresh medium and measured the cell viability after 3 days, 1  
511 week and 2 weeks using the CellTiter-Glo 3D Cell Viability Assay following manufacturer's  
512 instructions in an Orion II multiplate luminometer. Images were obtained with an Olympus



513 BX61 microscope at the indicated time points and the diameter of at least 70 tumoroids per  
514 condition was determined using Adobe Photoshop. For dose-response curves, PDOs were plated  
515 in 96-well plates in Matrigel and after 6 days in culture were treated with combinations of 5-FU  
516 and Irinotecan. Following 72 hours of treatment, we changed to fresh medium and treated with  
517 increasing concentrations of either 5-FU+Iri., dasatinib, verteporfin or combinations for 72 hours  
518 at the indicated concentrations. Cell viability was determined as described.

#### 519 **Cell cycle analysis.**

520 Cell cycle was determined by flow cytometry using the standard APC BrdU Flow Kit. Briefly,  
521 treated PDOs with combinations of 5-FU+Iri., as indicated, were stained with  
522 bromodeoxyuridine (BrdU) for 24 hours. Single cells were obtained and processed according to  
523 the manufacturer's instructions, with DAPI staining for the DNA content. The cells were  
524 analyzed in the LSR II analyzer.

#### 525 **Cell senescence assays**

526 Cell senescence was identified by the presence of SA- $\beta$ -galactosidase activity using two different  
527 approaches. On one hand, staining for SA- $\beta$ -galactosidase activity in cultured cells was carried  
528 out using the Senescence  $\beta$ -Galactosidase Staining Kit. Briefly, PDOs were seeded in 24-well  
529 plates (3000 cells per well). After 6 days, PDOs were treated with combinations of 5-FU+Iri. for  
530 72 hours and were subsequent stained with the  $\beta$ -Galactosidase Staining Solution for 2 hours,  
531 according to the manufacturer's instructions. Sections embedded in paraffin were counterstained  
532 with Fast Red for nuclei visualization. Images were obtained with an Olympus BX61  
533 microscope. On the other hand, SA- $\beta$ -galactosidase activity was addressed by flow cytometry  
534 using the Cell Event Senescence Green Flow Cytometry Assay Kit following the manufacturer's  
535 instructions, and analyzed in the LSR II analyzer.

536

#### 537 **Cell lysis and Western Blot**

538 Treated PDOs were lysed for 20 min on ice in 300  $\mu$ L of PBS plus 0.5% Triton X-100, 1 mM  
539 EDTA, 100 mM NA-orthovanadate, 0.2 mM phenyl-methylsulfonyl fluoride, and complete  
540 protease and phosphatase inhibitor cocktails. Lysates were analysed by western blotting using  
541 standard SDS-polyacrylamide gel electrophoresis (SDS-PAGE) techniques. In brief, protein  
542 samples were boiled in Laemmli buffer, run in polyacrylamide gels, and transferred onto  
543 polyvinylidene difluoride (PVDF) membranes. The membranes were incubated with the  
544 appropriate primary antibodies overnight at 4°C, washed and incubated with specific secondary  
545 horseradish peroxidase-linked antibodies. Peroxidase activity was visualized using the enhanced  
546 chemiluminescence reagent and autoradiography films.

547

#### 548 **RT-qPCR analysis**

549 Total RNA from treated PDOs was extracted with the RNeasy Micro Kit, and cDNA was  
550 produced with the RT-First Strand cDNA Synthesis Kit. RT-qPCR was performed in  
551 LightCycler 480 system using SYBR Green I Master Kit. Samples were normalized to the mean

552 of the housekeeping genes *TBP* and *HPRT1*. Primers used for RT-qPCR are listed in  
553 Supplementary Table S7.

554

### 555 **ChIP-sequencing analysis**

556 IC20-treated PDO5 was subjected to ChIP as previously described (41). Briefly, formaldehyde  
557 crosslinked cell extracts were sonicated, and chromatin fractions were incubated for 16 h with  
558 anti-p53 [abcam ab 1101] antibody in RIPA buffer and then precipitated with protein A/G-  
559 sepharose [GE Healthcare, Refs. 17-0618-01 and 17-0780-01]. Crosslinkage was reversed, and  
560 6–10 ng of precipitated chromatin was directly sequenced in the genomics facility of Parc de  
561 Recerca Biomèdica de Barcelona (PRBB) using Illumina® HiSeq platform. Raw single-end 50-  
562 bp sequences were filtered by quality ( $Q > 30$ ) and length (length  $> 20$  bp) with Trim Galore  
563 (42). Filtered sequences were aligned against the reference genome (hg38) with Bowtie2 (43).  
564 MACS2 software (44) was run first for each replicate using unique alignments ( $q$ -value  $< 0.1$ ).  
565 Peak annotation was performed with CHIPseeker package (45) and peak visualization was done  
566 with Integrative Genomics Viewer (IGV). ChIP-sequencing data are deposited at the GEO  
567 database with accession number GSE164161.

568

### 569 **RNA-sequencing experiments and data analysis**

570 Total RNA from untreated and treated PDOs was extracted using RNeasy Micro Kit. The RNA  
571 concentration and integrity were determined using Agilent Bioanalyzer [Agilent Technologies].  
572 Libraries were prepared at the Genomics Unit of PRBB (Barcelona, Spain) using standard  
573 protocols, and cDNA was sequenced using Illumina HiSeq platform, obtaining ~45-64 million  
574 50-bp paired-end reads per sample. Adapter sequences were trimmed with Trim Galore.  
575 Sequences were filtered by quality ( $Q > 30$ ) and length ( $> 20$  bp). Filtered reads were mapped  
576 against the latest release of the human reference genome (hg38) using default parameters of  
577 TopHat (v.2.1.1) (46) and expressed transcripts were then assembled. High-quality alignments  
578 were fed to HTSeq (v.0.9.1) (47) to estimate the normalized counts of each expressed gene.  
579 Differentially expressed genes between different conditions were explored using DESeq2 R  
580 package (v.1.24.0) (48) and adjusted P-values for multiple comparisons were calculated applying  
581 the Benjamini-Hochberg correction (FDR) (see Supplementary Table S2). Plots were done in R.  
582 Expression heatmaps were generating using the heatmaply and pheatmap packages in R (49).  
583 Gene Set Enrichment Analysis (GSEA) was performed with described gene sets using gene set  
584 permutations ( $n = 1000$ ) for the assessment of significance and signal-to-noise metric for ranking  
585 genes. RNA-sequencing data are deposited at the GEO database with accession number  
586 GSE155354.

587

### 588 **Signature definition**

589 To generate the fetal intestinal stem cell signatures, we selected genes with  $\log_2$  Fold Change  
590 (FC) TreatedvsControl  $> 0$  and FetalvsAdult (21)  $> 0$  in the case of the 28up-feISC and  $\log_2$ FC  
591 TreatedvsControl  $< 0$  and FetalvsAdult  $< 0$  in the case of the 8down-feISC. Next, we used the

592 Marisa data set to performed expression correlation matrices for the selected expression gene  
593 pairs using the corrplot package (v.0.84). To obtain the simplified signature genes were scored  
594 by their coordinate expression taking into account the three CRCR datasets analyzed (see  
595 Supplementary Table S5). Then it was evaluated adding a value of single genes to the simplest  
596 signature composed by the highest scored 28up plus the highest scored 8down-feISC. The  
597 process ended when adding a gene did not improved the prognosis value. Correlations were  
598 considered as statistically significant when the Pearson correlation coefficient corresponded to a  
599 p value below 0.05. Clusters of genes were selected when the absolute value for the Pearson  
600 correlation coefficient was above 0.1. Correlations were considered as statistically significant  
601 when the Pearson correlation coefficient corresponded to a p value below 0.05. Clusters of genes  
602 were selected when the absolute value for the Pearson correlation coefficient was above 0.1.

603  
604

### 605 **Quantification and Statistical analysis**

606 Statistical parameters, including number of events quantified, standard deviation and statistical  
607 significance, are reported in the figures and in the figure legends. Statistical analysis has been  
608 performed using GraphPad Prism 6 software, and  $P < 0.05$  is considered significant. Two-sided  
609 Student's t-test was used to compare differences between two groups. Each experiment shown in  
610 the manuscript has been repeated at least twice. Combinations of 5-FU+Iri. treatment has been  
611 checked for an appropriate IC20 and IC30 effect in every experiment, by cell viability assay.  
612 Bioinformatic analyses were performed as indicated above.

613

### 614 **REFERENCES**

- 615 1. Brenner H, Kloor M, Pox CP. Colorectal cancer. *Lancet*. 2014.
- 616 2. Batlle E, Clevers H. Cancer stem cells revisited. *Nat. Med.* 2017.
- 617 3. Merlos-Suárez A, Barriga FM, Jung P, Iglesias M, Céspedes MV, Rossell D, et al. The  
618 intestinal stem cell signature identifies colorectal cancer stem cells and predicts disease  
619 relapse. *Cell Stem Cell*. 2011;
- 620 4. Colomer C, Margalef P, Villanueva A, Vert A, Pecharroman I, Solé L, et al. IKK $\alpha$  Kinase  
621 Regulates the DNA Damage Response and Drives Chemo-resistance in Cancer. *Mol Cell*.  
622 2019;75.
- 623 5. Cánovas B, Igea A, Sartori AA, Gomis RR, Paull TT, Isoda M, et al. Targeting p38 $\alpha$   
624 Increases DNA Damage, Chromosome Instability, and the Anti-tumoral Response to  
625 Taxanes in Breast Cancer Cells. *Cancer Cell*. 2018;
- 626 6. He S, Sharpless NE. Senescence in Health and Disease. *Cell*. 2017.
- 627 7. Faget D V., Ren Q, Stewart SA. Unmasking senescence: context-dependent effects of  
628 SASP in cancer. *Nat. Rev. Cancer*. 2019.
- 629 8. Milanovic M, Fan DNY, Belenki D, Däbritz JHM, Zhao Z, Yu Y, et al. Senescence-  
630 associated reprogramming promotes cancer stemness. *Nature*. 2018;

- 631 9. Schosserer M, Grillari J, Breitenbach M. The dual role of cellular senescence in  
632 developing tumors and their response to cancer therapy. *Front. Oncol.* 2017.
- 633 10. Cheung P, Xiol J, Dill MT, Yuan WC, Panero R, Roper J, et al. Regenerative  
634 Reprogramming of the Intestinal Stem Cell State via Hippo Signaling Suppresses  
635 Metastatic Colorectal Cancer. *Cell Stem Cell.* 2020;27.
- 636 11. Lukin DJ, Carvajal LA, Liu WJ, Resnick-Silverman L, Manfredi JJ. p53 promotes cell  
637 survival due to the reversibility of its cell-cycle checkpoints. *Mol Cancer Res.* 2015;
- 638 12. Saleh T, Tyutyunyk-Massey L, Gewirtz DA. Tumor cell escape from therapy-induced  
639 senescence as a model of disease recurrence after dormancy. *Cancer Res.* 2019;
- 640 13. Xu M, Pirtskhalava T, Farr JN, Weigand BM, Palmer AK, Weivoda MM, et al. Senolytics  
641 improve physical function and increase lifespan in old age. *Nat Med.* 2018;
- 642 14. Cho YH, Ro EJ, Yoon JS, Mizutani T, Kang DW, Park JC, et al. 5-FU promotes stemness  
643 of colorectal cancer via p53-mediated WNT/ $\beta$ -catenin pathway activation. *Nat Commun.*  
644 2020;
- 645 15. Mani SA, Guo W, Liao MJ, Eaton EN, Ayyanan A, Zhou AY, et al. The Epithelial-  
646 Mesenchymal Transition Generates Cells with Properties of Stem Cells. *Cell.* 2008;
- 647 16. Liu M, Sakamaki T, Casimiro MC, Willmarth NE, Quong AA, Ju X, et al. The canonical  
648 NF- $\kappa$ B pathway governs mammary tumorigenesis in transgenic mice and tumor stem cell  
649 expansion. *Cancer Res.* 2010;
- 650 17. Rajasekhar VK, Studer L, Gerald W, Socci ND, Scher HI. Tumour-initiating stem-like  
651 cells in human prostate cancer exhibit increased NF- $\kappa$ B signalling. *Nat Commun.* 2011;
- 652 18. Kagoya Y, Yoshimi A, Kataoka K, Nakagawa M, Kumano K, Arai S, et al. Positive  
653 feedback between NF- $\kappa$ B and TNF- $\alpha$  promotes leukemia-initiating cell capacity. *J Clin*  
654 *Invest.* 2014;
- 655 19. Nusse YM, Savage AK, Marangoni P, Rosendahl-Huber AKM, Landman TA, De  
656 Sauvage FJ, et al. Parasitic helminths induce fetal-like reversion in the intestinal stem cell  
657 niche. *Nature.* 2018;
- 658 20. Yui S, Azzolin L, Maimets M, Pedersen MT, Fordham RP, Hansen SL, et al. YAP/TAZ-  
659 Dependent Reprogramming of Colonic Epithelium Links ECM Remodeling to Tissue  
660 Regeneration. *Cell Stem Cell.* 2018;
- 661 21. Mustata RC, Vasile G, Fernandez-Vallone V, Strollo S, Lefort A, Libert F, et al.  
662 Identification of Lgr5-Independent Spheroid-Generating Progenitors of the Mouse Fetal  
663 Intestinal Epithelium. *Cell Rep.* 2013;
- 664 22. Marisa L, de Reyniès A, Duval A, Selves J, Gaub MP, Vescovo L, et al. Gene Expression  
665 Classification of Colon Cancer into Molecular Subtypes: Characterization, Validation, and  
666 Prognostic Value. *PLoS Med.* 2013;
- 667 23. Jorissen RN, Gibbs P, Christie M, Prakash S, Lipton L, Desai J, et al. Metastasis-  
668 associated gene expression changes predict poor outcomes in patients with Dukes stage B  
669 and C colorectal cancer. *Clin Cancer Res.* 2009;
- 670 24. Cortazar AR, Torrano V, Martín-Martín N, Caro-Maldonado A, Camacho L, Hermanova

- 671 I, et al. Cancertool: A visualization and representation interface to exploit cancer datasets.  
672 Cancer Res. 2018;
- 673 25. Fischer M. Census and evaluation of p53 target genes. *Oncogene*. 2017.
- 674 26. Guinney J, Dienstmann R, Wang X, de Reyniès A, Schlicker A, Soneson C, et al. Guinney  
675 et al. 2015. *Nat Med*. 2015;
- 676 27. Lee HO, Hong Y, Etlioglu HE, Cho YB, Pomella V, Van den Bosch B, et al. Lineage-  
677 dependent gene expression programs influence the immune landscape of colorectal  
678 cancer. *Nat Genet*. 2020;
- 679 28. Puig I, Tenbaum SP, Chicote I, Arqués O, Martínez-Quintanilla J, Cuesta-Borrás E, et al.  
680 TET2 controls chemoresistant slow-cycling cancer cell survival and tumor recurrence. *J*  
681 *Clin Invest*. 2018;
- 682 29. Beauséjour CM, Krtolica A, Galimi F, Narita M, Lowe SW, Yaswen P, et al. Reversal of  
683 human cellular senescence: Roles of the p53 and p16 pathways. *EMBO J*. 2003;
- 684 30. Kreso A, O'Brien CA, Van Galen P, Gan OI, Notta F, Brown AMK, et al. Variable clonal  
685 repopulation dynamics influence chemotherapy response in colorectal cancer. *Science*  
686 (80- ). 2013;
- 687 31. Brown JA, Yonekubo Y, Hanson N, Sastre-Perona A, Basin A, Rytlewski JA, et al. TGF-  
688  $\beta$ -Induced Quiescence Mediates Chemoresistance of Tumor-Propagating Cells in  
689 Squamous Cell Carcinoma. *Cell Stem Cell*. 2017;
- 690 32. Weinberg RA. The retinoblastoma protein and cell cycle control. *Cell*. 1995.
- 691 33. Warren JSA, Xiao Y, Lamar JM. YAP/TAZ activation as a target for treating metastatic  
692 cancer. *Cancers (Basel)*. 2018.
- 693 34. Rehman SK, Haynes J, Collignon E, Brown KR, Wang Y, Nixon AML, et al. Colorectal  
694 Cancer Cells Enter a Diapause-like DTP State to Survive Chemotherapy. *Cell*. 2021;
- 695 35. Dai Y, Wang L, Tang J, Cao P, Luo Z, Sun J, et al. Activation of anaphase-promoting  
696 complex by p53 induces a state of dormancy in cancer cells against chemotherapeutic  
697 stress. *Oncotarget*. 2016;
- 698 36. Pefani DE, Pankova D, Abraham AG, Grawenda AM, Vlahov N, Scrace S, et al. TGF- $\beta$   
699 Targets the Hippo Pathway Scaffold RASSF1A to Facilitate YAP/SMAD2 Nuclear  
700 Translocation. *Mol Cell*. 2016;
- 701 37. Fumagalli A, Oost KC, Kester L, Morgner J, Bornes L, Bruens L, et al. Plasticity of Lgr5-  
702 Negative Cancer Cells Drives Metastasis in Colorectal Cancer. *Cell Stem Cell*. 2020;
- 703 38. De Sousa E Melo F, Kurtova A V., Harnoss JM, Kljavin N, Hoeck JD, Hung J, et al. A  
704 distinct role for Lgr5 + stem cells in primary and metastatic colon cancer. *Nature*. 2017;
- 705 39. Morral C, Stanisavljevic J, Hernando-Momblona X, Mereu E, Álvarez-Varela A, Cortina  
706 C, et al. Zonation of Ribosomal DNA Transcription Defines a Stem Cell Hierarchy in  
707 Colorectal Cancer. *Cell Stem Cell*. 2020;
- 708 40. Sato T, Stange DE, Ferrante M, Vries RGJ, Van Es JH, Van Den Brink S, et al. Long-term  
709 expansion of epithelial organoids from human colon, adenoma, adenocarcinoma, and  
710 Barrett's epithelium. *Gastroenterology*. 2011;



- 711 41. Mulero M, Ferres-Marco D, Islam A, Margalef P, Pecoraro M, Toll A, et al. Chromatin-  
712 bound IκBα regulates a subset of polycomb target genes in differentiation and cancer.  
713 *Cancer Cell*. 2013;24.
- 714 42. Krueger B, Friedrich T, Förster F, Bernhardt J, Gross R, Dandekar T. Different  
715 evolutionary modifications as a guide to rewire two-component systems. *Bioinform Biol*  
716 *Insights*. 2012;
- 717 43. Langmead B, Salzberg SL. Fast gapped-read alignment with Bowtie 2. *Nat Methods*.  
718 2012;
- 719 44. Zhang Y, Liu T, Meyer CA, Eeckhoute J, Johnson DS, Bernstein BE, et al. Model-based  
720 analysis of ChIP-Seq (MACS). *Genome Biol*. 2008;
- 721 45. Yu G, Wang LG, He QY. ChIP seeker: An R/Bioconductor package for ChIP peak  
722 annotation, comparison and visualization. *Bioinformatics*. 2015;
- 723 46. Kim D, Pertea G, Trapnell C, Pimentel H, Kelley R, Salzberg SL. TopHat2: Accurate  
724 alignment of transcriptomes in the presence of insertions, deletions and gene fusions.  
725 *Genome Biol*. 2013;
- 726 47. Anders S, Pyl PT, Huber W. HTSeq-A Python framework to work with high-throughput  
727 sequencing data. *Bioinformatics*. 2015;
- 728 48. Love MI, Huber W, Anders S. Moderated estimation of fold change and dispersion for  
729 RNA-seq data with DESeq2. *Genome Biol*. 2014;
- 730 49. Galili T, O'Callaghan A, Sidi J, Sievert C. Heatmaply: An R package for creating  
731 interactive cluster heatmaps for online publishing. *Bioinformatics*. 2018;

732

733 **Acknowledgments:** We want to thank the Bigas' and Espinosa's lab members for constructive  
734 discussions and suggestions and technical support. We thank our patients for their generosity and  
735 to MARbiobank and the IdiPAZ Biobank integrated in the Spanish Hospital Biobanks Network  
736 (RetBioH; [www.redbiobancos.es](http://www.redbiobancos.es)).

737

### 738 **Funding:**

- 739 1. Instituto de Salud Carlos III FEDER (PI16/00437 and PI19/00013)
- 740 2. Generalitat de Catalunya 2017SGR135
- 741 3. PID2019-104867RB-I00/AEI/10.13039/501100011033 funded by the Agencia Estatal de  
742 Investigación and the "Xarxa de Bancs de tumors sponsored by Pla Director d'Oncologia de  
743 Catalunya (XBTC)
- 744 4. Fundación HNA to A.V. research team in the development of orthoxenografts/PDOX.
- 745 5. Instituto de Salud Carlos III-Fondo Europeo de Desarrollo Regional (CIBERONC;  
746 CB16/12/00244, CB16/12/00241 and CB16/12/00273).
- 747 6. IdiPAZ Biobank is supported by Instituto de Salud Carlos III, Spanish Health Ministry (Grant  
748 RD09/0076/00073) and Farmaindustria through the Cooperation Program in Clinical and  
749 Translational Research of the Community of Madrid.



- 750 7. LS is supported by AGAUR (2018 FI\_B 00088/2020 FI\_B2 00150)  
751 8. A.Ba and T.L-J by a contract from CIBERONC (ISCIII-Feder).  
752 9. T.C-T was funded by the Instituto de Salud Carlos III-FSE (MS17/ 00037; PI18/00014).

753

754 **Author contributions:**

755 Conceptualization: AB, LE

756 Biochemical assays, in vitro and in vivo experiments: AV, MG, MS, RGR, MMI, IS

757 Experiments, investigation and evaluation of results: LS, TLJ, AVe, TCT, AM

758 Big data analysis and statistical analysis: TLJ, YG, ELA, FT

759 Clinicopathological characterization of human tumors: MG, RS, CM.

760 Clinical advice: MG, RS, CM

761 Writing – original draft: LE, AB

762 Writing -review & editing: all authors

763

764 **Competing interests:** Authors declare that they have no competing interests.

765

766 **Data and materials availability:** All data associated with this study are present in the paper or  
767 the Supplementary Materials. RNA sequencing and ChIP sequencing data have been deposited in  
768 NCBI's Gene Expression and are accessible through GEO Series accession no. GSE155354 and  
769 no. GSE164161, respectively

770

771

772

773

774

775 **FIGURE LEGENDS**

776 **Figure 1. Low-dose CT treatment induces a non-senescent quiescent-like state to CRC PDO**  
777 **in the absence of persistent DNA damage.**

778 (A) Dose-response assay of PDO5 treated with 5-FU+Iri. for 72 hours, indicating the IC<sub>20</sub> and  
779 IC<sub>30</sub> doses. (B and C) Quantification of PDO5 (B) viability and (C) diameter, after 72 hours of  
780 5-FU+Iri. treatment and subsequent washout and culture in fresh medium for 1 and 2 weeks.  
781 Representative data from 4 independent experiments is shown. (D) Representative images (upper  
782 panel) of ki67 staining by immunofluorescence (IF) in PDO5 tumoroid treated with 5-FU+Iri. at  
783 IC<sub>20</sub> and IC<sub>30</sub> for 72 hours, and quantification (lower panel) of the percentage of ki67<sup>+</sup>  
784 cells/sphere in each condition. Counterstained with DAPI. (E) Quantification of SA-β-Gal  
785 activity detected by flow cytometry in PDO5 cells treated as in (D). Representative data from 2  
786 independent experiments is shown. (F) Dose-response curves of PDO5 treated with the senolytic  
787 drug dasatinib for 3 days after pre-treatment with 5-FU+Iri. at the indicated doses for 72 hours.  
788 (G) Comet assay to measure levels of DNA damage in PDO5 treated for 3 hours as indicated.  
789 (H) Western blot (WB) analysis of the DNA damage sensor γH2A.X in control and 5-FU+Iri.-  
790 treated PDO5 cells collected at the indicated time points after treatment. (I and J) Comet assay  
791 to measure levels of DNA damage in (I) 53 WT PDO5 and (J) p53 mutants PDO4 and PDO8,  
792 treated for 72 hours as indicated.

793 The statistical analysis in (D), (G), (I) and (J) was performed by one-way ANOVA test,  
794 comparing treated with untreated condition and treated conditions with each other. p values are  
795 indicated as \*p<0.05 and \*\*\*\*p < 0.0001. n.s., no significant; 5-FU, 5-fluorouracil; Iri,  
796 irinotecan; SA-β-Gal, SA-β-Galactosidase; CT, control; IC<sub>20</sub>, IC<sub>30</sub> and IC<sub>60</sub>, 5-FU+Iri. treatment  
797 that results in 20%, 30% and 60% cell death, respectively, compared with untreated cell growth.

798

799 **Figure 2. PQL phenotype is associated with acquisition of a fetal intestinal stem cell (feISC)**  
800 **signature.**

801 (A) Barplot depicting the normalized enrichment score of the statistically significant enriched  
802 pathways obtained by GSEA analysis with the Hallmark gene set for treated samples (NOM p-  
803 val<0.05). (B) WB analysis of control and treated PDO5 cells collected at the indicated time  
804 points after 5-FU+Iri. treatment. (C) RT-qPCR analysis of selected p53 target genes from control  
805 and IC<sub>20</sub>-treated PDO5 cells. (D) GSEA of an intestinal stem cell (ISC) gene set, according to  
806 Muñoz et al, in treated versus IC<sub>20</sub>-treated PDO5 condition. (E) Heat map showing the  
807 expression levels of the indicated ISC genes in untreated, IC<sub>20</sub> and IC<sub>30</sub>-treated PDO5 cells. (F  
808 and G) GSEA of (F) a fetal down and (G) a fetal up stem cell gene set, according to Mustata et  
809 al, in control (C) versus treated (T) PDO5 condition.

810 The statistical analysis in (C) was performed by T-Student test, comparing treated with untreated  
811 condition. p values are indicated as \*p<0.05, \*\*p < 0.01 and \*\*\*\*p < 0.0001. n.s., no significant;  
812 CT, control; IC<sub>20</sub> and IC<sub>30</sub>, 5-FU+Iri. treatment that results in 20% and 30% cell death,  
813 respectively, compared with untreated cell growth; GSEA, gene set enrichment analysis; NES,  
814 normalized enriched score.

815

816 **Figure 3. CT-induced quiescent cells display a fetal intestinal stem cell signature that is p53**  
817 **dependent.**

818 (A) Expression correlation matrix from the 28up+8down-feISC gene signature using the Marisa  
819 database ( $n=566$ ). The size of circles and color intensity are proportional to the Pearson  
820 correlation coefficient found for each gene pair. (B) RT-qPCR analysis of normalized relative  
821 expression of selected 28up+8down-feISC signature genes in control and treated PDO5 as  
822 indicated. (C) WB analysis of the indicated antibodies in control and treated PDO5 cells  
823 collected at the indicated time points after 5-FU+Iri. treatment. (D, E and F) RT-qPCR analysis  
824 of normalized relative expression of selected 28up-feISC signature genes plus CDKN1A gene in  
825 (D) control and CT-treated *TP53* WT PDO66, (E) *TP53* mutant PDO4 and (F) PDO5 *TP53* KO  
826 #3. (G) WB analysis of various CRC cell lines untreated or collected after 72 hours of 5-FU+Iri.  
827 treatment. Membranes were incubated with the indicated antibodies. (H) Pie charts showing the  
828 molecular subtype distribution (percentage), according to Guinney et al, in patients within the  
829 feISC signature groups as indicated. (I) Localization of several 28up-fetal-ISC genes in  
830 epithelial subtypes cell states 1-9 previously classified in Lee et al 2020. The *t*-SNE plots were  
831 obtained using the web-based tool URECA (User-friendly InteRface tool to Explore Cell Atlas).  
832 Cell states 1, 5 and 6 correspond to a transcriptional group enriched for secretory and migratory  
833 gene expression, whereas cell states 2, 3, 4, 7, 8 and 9 correspond to transport and Wnt signaling  
834 gene expression (27).

835 The statistical analysis in (B), (D), (E) and (F) was performed by T-Student test, comparing  
836 treated with untreated condition. p values are indicated as \* $p < 0.05$ , \*\* $p < 0.01$  and \*\*\*\* $p <$   
837  $0.0001$ . n.s., no significant. CT, control; IC<sub>20</sub> and IC<sub>30</sub>, 5-FU+Iri. treatment that results in 20%  
838 and 30% cell death, respectively, compared with untreated cell growth.

839

840 **Figure 4. TP53 WT PQL cells retain tumor-initiating capacity in vitro and in vivo.**

841 (A and B) Number of PDOs (upper panels) and diameter measurement (lower panels) of (A)  
842 *TP53* WT PDO5 and (B) *TP53* mutant PDO4 and PDO8 treated with 5-FU+Iri. as indicated and  
843 seeded at 300 cells/well as single cells and after 2 weeks with fresh medium. (C) In vivo  
844 bioluminescence representative images of mice administered intracardiac injection of 40.000  
845 luciferase-PDO5 CT and IC<sub>20</sub> or IC<sub>30</sub>-treated cells in NSG mice. (D) Percentage of healthy and  
846 with metastasis mice at week 15 from (C). (E) Kaplan-Meier representation of disease-free  
847 survival probability over time for untreated, IC<sub>20</sub> and IC<sub>30</sub>-treated PDO inoculated intracardiac in  
848 mice. (F, G and H) (F) Number of intraperitoneal implants, (G) tumor weight of in situ growing  
849 tumors and intraperitoneal implants and (H) photographs of tumors derived from orthotopically  
850 implanted CT, IC<sub>20</sub> and IC<sub>30</sub>-pretreated PDOs in nude mice. (I) Immunohistochemistry (IHC)  
851 analysis of Ki67 in PDO-derived in situ tumors and implants and quantification of the percentage  
852 of Ki67<sup>+</sup> tumor cells in the indicated conditions.

853 The statistical analysis in (A), (B) and (I) was performed by one-way ANOVA test comparing  
854 treated with untreated conditions and treated conditions with each other. The statistical analysis

855 in (F) and (G) by T-Student test, comparing treated with untreated condition. p values are  
856 indicated as \* $p < 0.05$  and \*\* $p < 0.01$ . n.s., no significant; 5-FU, 5-fluorouracil; Iri, irinotecan;  
857 DFS, disease-free survival; IC<sub>20</sub> and IC<sub>30</sub>, 5-FU+Iri. treatment that results in 20% and 30%  
858 growth reduction, respectively, compared with untreated cell growth.

859

860

861 **Figure 5. Identification of a fetal ISC signature with prognosis value in CRC.** (A) Cluster  
862 analysis of the 28up+8down-feISC signature used to classify patients into at least two subsets in  
863 the Marisa colorectal cancer database. We allowed unsupervised hierarchical clustering of the  
864 28+8 genes, while we enforced the classification of patients into 4 subsets (colored in red, green,  
865 light blue and purple). Positive and negative correlation expression levels is shown in red and  
866 blue, respectively. (B) Kaplan-Meier representation of disease-free survival probability over time  
867 for patients unclassified and with high or low expression of the 28up+8down-feISC signature  
868 selected according to (A) for Marisa colorectal cancer database (28up=high/8down=low  $n=66$ ,  
869 28up=low/8down=high  $n=114$  and Unclassified  $n=385$ ). Jorissen (28up=high/8down=low  
870  $n=114$  and 28up=low/8down=high  $n=112$ ) and TCGA (28up=high/8down=low  $n=39$ ,  
871 28up=low/8down=high  $n=96$  and Unclassified  $n=194$ ) colorectal cancer databases were selected  
872 according to their cluster analysis of the 28up+8down-feISC signature. (C, D and E) Kaplan-  
873 Meier curves representing the disease-free survival probability over time for patients classified  
874 according to their cluster analysis of the 28up+8down-feISC signature of patient groups from (C)  
875 stage II (28up=high/8down=low  $n=23$  and 28up=low/8down=high  $n=126$ ), (D) stage II and III  
876 (28up=high/8down=low  $n=100$  and 28up=low/8down=high  $n=368$ ) and (E) stage IV  
877 (28up=high/8down=low  $n=25$  and 28up=low/8down=high  $n=35$ ), from Marisa colorectal cancer  
878 database. (F) Kaplan-Meier representation of disease-free survival probability over time of  
879 patents classified according to their *TP53* status in the Marisa colorectal cancer dataset (*TP53*  
880 WT  $n=161$  and *TP53* MUT  $n=190$ ). (G) Kaplan-Meier representation of disease-free survival  
881 probability over time of patients, from the Marisa dataset, classified according to their cluster  
882 analysis of the 28up+8down-feISC signature for patient groups from *TP53* WT  
883 (28up=high/8down=low  $n=27$  and 28up=low/8down=high  $n=58$ ) and *TP53* mutant  
884 (28up=high/8down=low  $n=6$  and 28up=low/8down=high  $n=14$ ). (H) Kaplan-Meier  
885 representation of disease-free survival probability over time of Marisa patient's tumors  
886 previously categorized as CMS4 (26), and classified according to their cluster analysis of the  
887 28up+8down-feISC signature (28up=high/8down=low  $n=23$  and 28up=low/8down=high  $n=68$ ).  
888 (I) Kaplan-Meier representation of disease-free survival probability over time for patients with  
889 high or low expression of the 5up+3down-feISC signature of stage III (5up=high/3down=low  
890  $n=17$  and 5up=low/3down=high  $n=156$ ) and stage II and III (5up=high/3down=low  $n=87$  and  
891 5up=low/3down=high  $n=382$ ) Marisa database, selected according to their unsupervised  
892 hierarchical cluster analysis.

893 Data in (A) show normalized, centered and scaled Illumina probe set intensities on a log<sub>2</sub> scale.

894 The stage lane represents the stage subtype that corresponds to each patient. For statistical

895 analysis of the Kaplan-Meier estimates we used Cox proportional hazards models (See  
896 Supplementary Table S4). HR, hazard ratio.; p, p-value. See also **Figure S5**.

897

898 **Figure 6. Acquisition of feISC by CT treatment is dependent on YAP1 activation.**

899 **(A)** WB analysis of the indicated antibodies of control and *TP53-depleted* PDO5 KO# 3 cells  
900 collected after 72 hours of 5-FU+Iri. treatment. **(B)** WB analysis of *TP53* WT (HCT116 and  
901 Ls174T) and *TP53* mutant (SW480 and HT29-M6) CRC cell lines untreated and collected after  
902 72 hours of 5-FU+iri. treatment. **(C)** Representative images of YAP1 and the proliferation  
903 marker ki67 staining by IF in tumors derived from orthotopically implanted CT, IC<sub>20</sub> and IC<sub>30</sub>-  
904 pretreated PDOs in nude mice. White arrows indicate nuclear translocation of YAP1.  
905 Counterstained, DAPI. **(D)** IHC analysis of YAP1 in representative type 1 (#14) and type 2 (#3,  
906 #42) colorectal tumor samples from the same patient at diagnosis (biopsy) and after neoadjuvant  
907 therapy at the time of surgery (post-neoadjuvancy). We classified patients based on ki67 levels in  
908 the tumor at diagnosis and at surgery. Complete results are shown in Supplementary Table S6.  
909 **(E)** Representative images of YAP1 and the fetal gene S100A4 by IF in type 1 (#24) and type 2  
910 (#58) colorectal tumor samples (post-neoadjuvancy). **(F)** RT-qPCR analysis of normalized  
911 relative expression of selected 28up-feISC signature genes in control and treated PDO5 with 5-  
912 FU+Iri. alone or in combination with verteporfin at a final concentration of 0.2 μM. **(G)**  
913 Representative stereoscopic images (left panel) of the *TP53* WT PDO5 and *TP53* mutant PDO8  
914 treated with 5-FU+Iri. alone, verteporfin alone or in combination with verteporfin at a final  
915 concentration of 1 μM and quantification (right panel) of the relative cell growth in both PDOs  
916 treated with verteporfin alone or in combination with 5-FU+Iri. **(H)** Dose-response curves of  
917 IC<sub>20</sub>-pretreated PDO5 treated for 3 days as indicated.

918 Statistical analysis in (F) was performed by T-Student test, comparing treated with untreated  
919 conditions and treated conditions with each other. p values are indicated as \*p<0.05, \*\*p < 0.01,  
920 n.s., no significant. CT, control; IC<sub>20</sub> and IC<sub>30</sub>, 5-FU+Iri. treatment that results in 20% and 30%  
921 cell death, respectively, compared with untreated cell growth.

922

923

924

925

926

927

928

929

930

931

932

933



934 **FIGURES**

935

936

937 **Fig.1.**

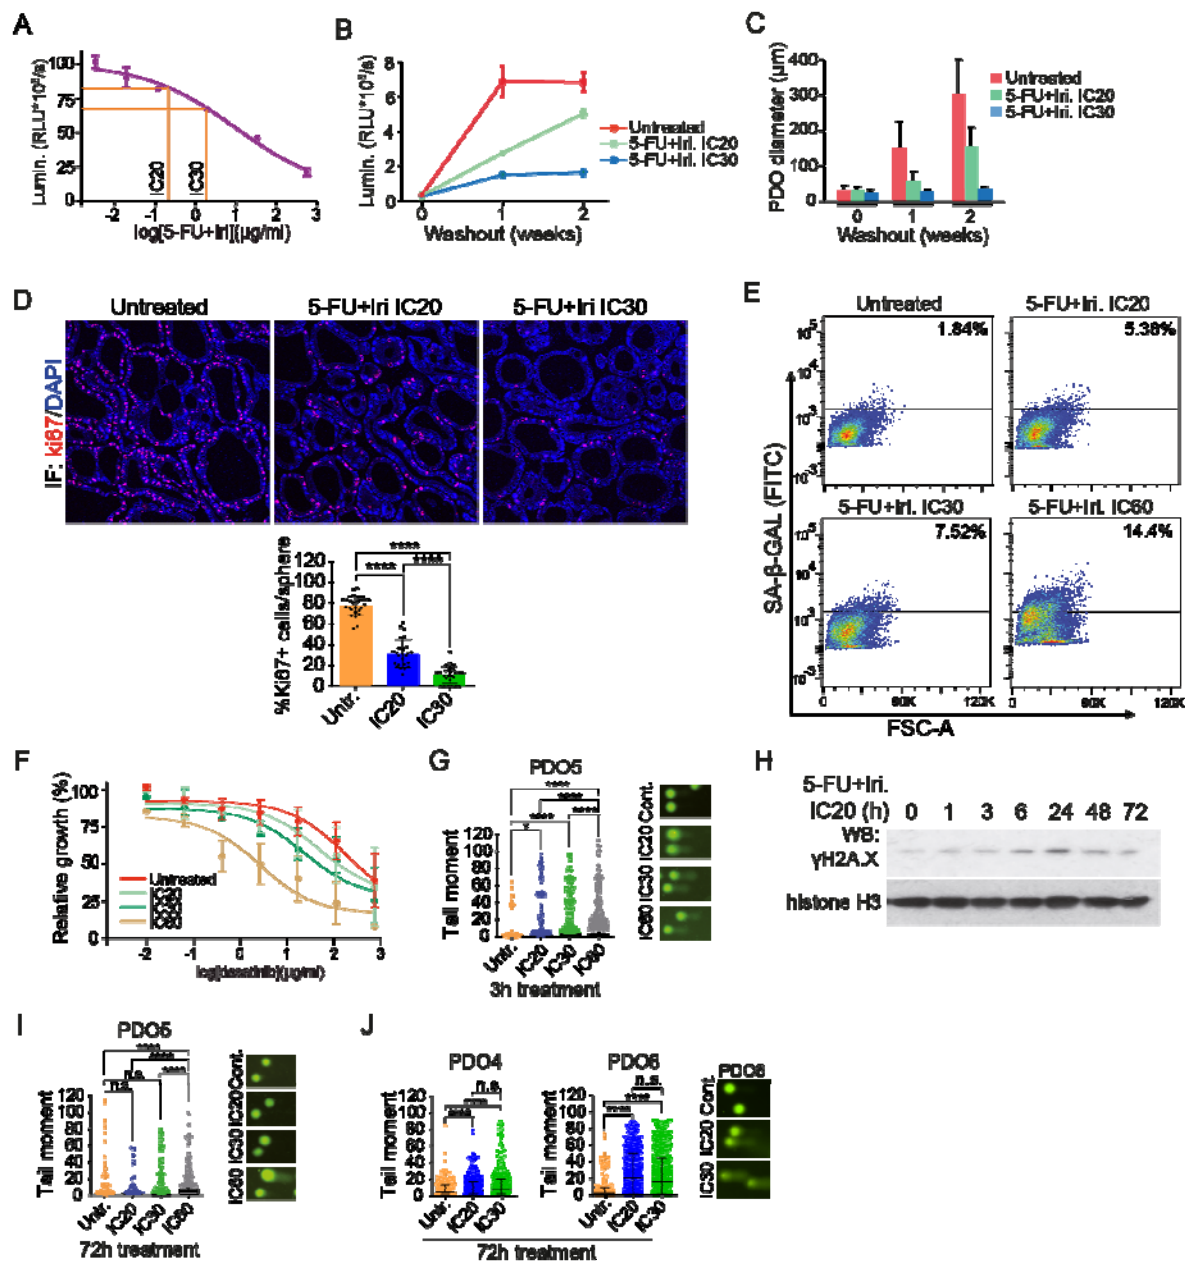

938

939

940

941

942



943 **Fig.2.**

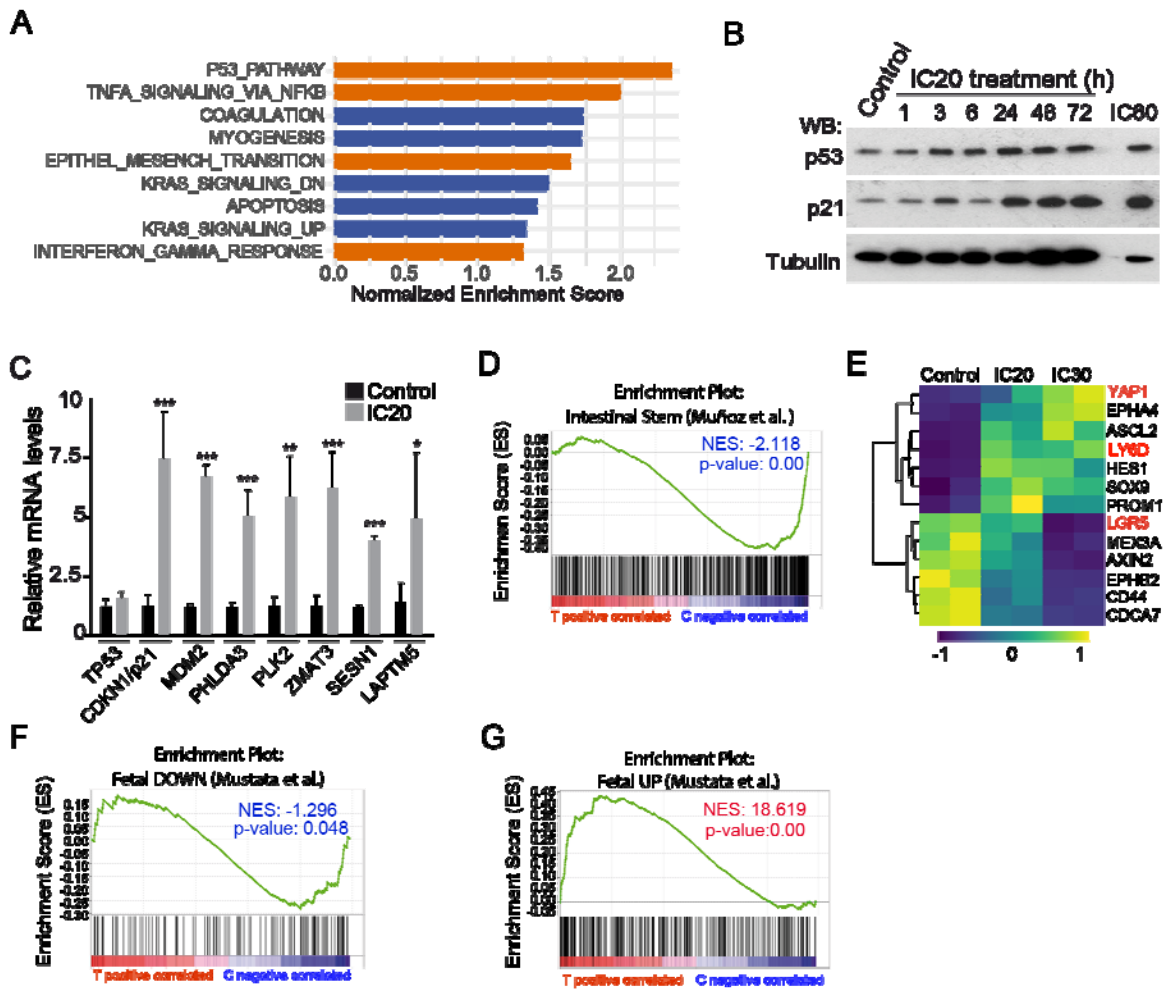

944

945

946

947

948

949

950

951

952

953

954 **Fig.3.**

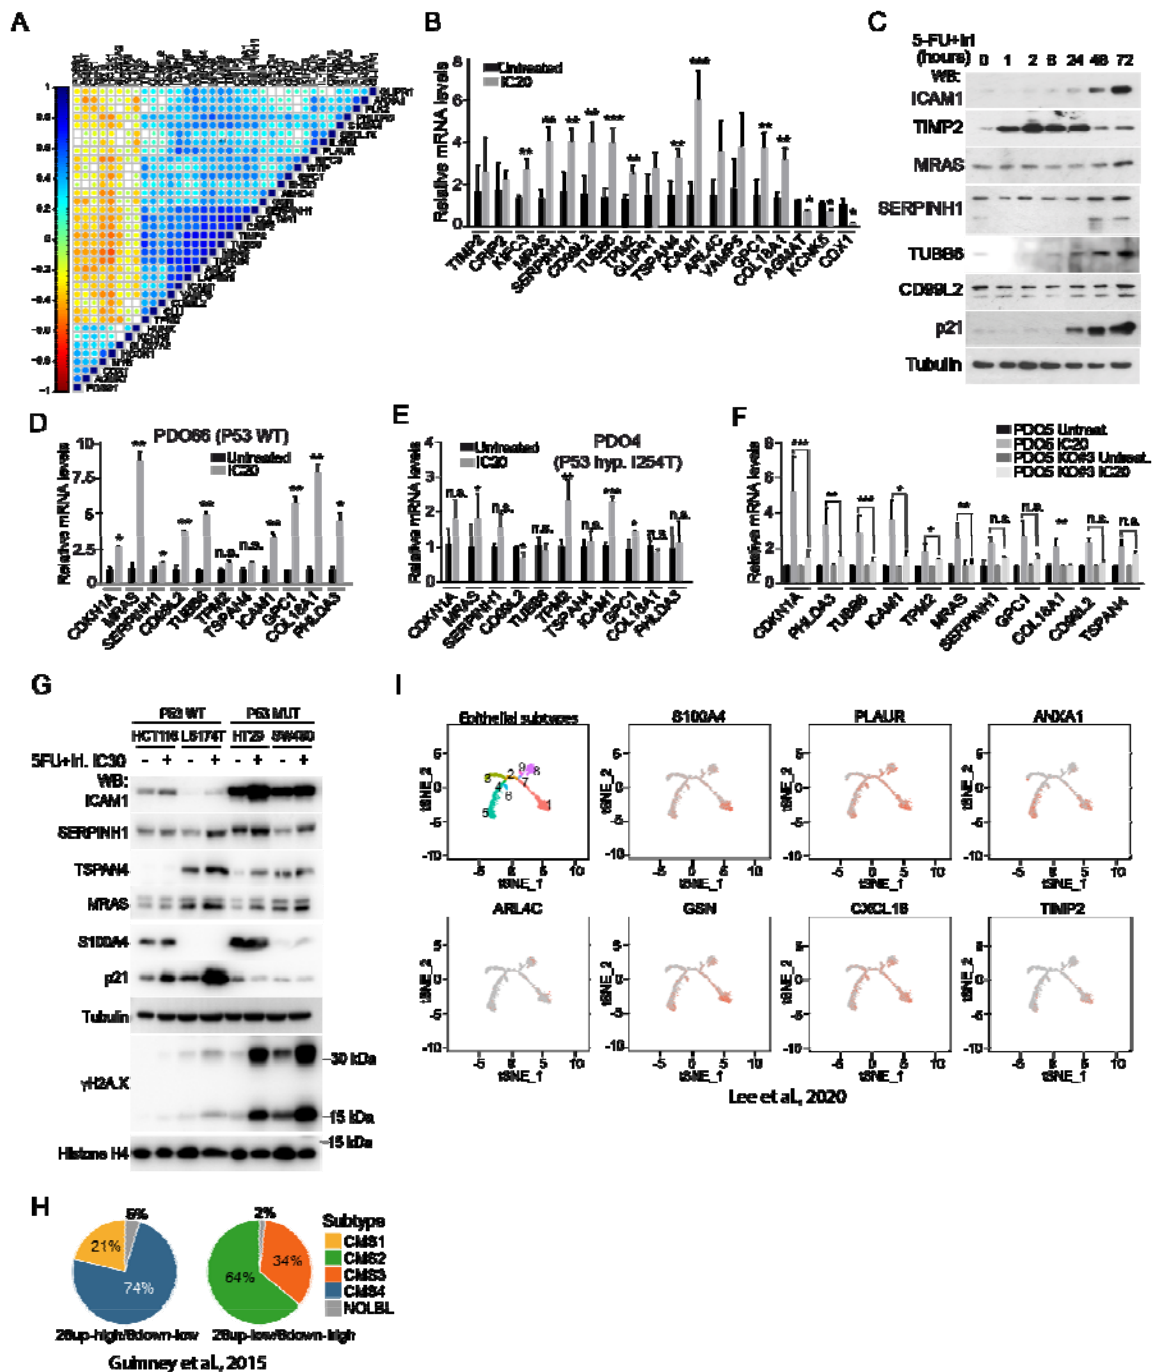

955

956

957

958

959

960

961

962 **Fig.4.**

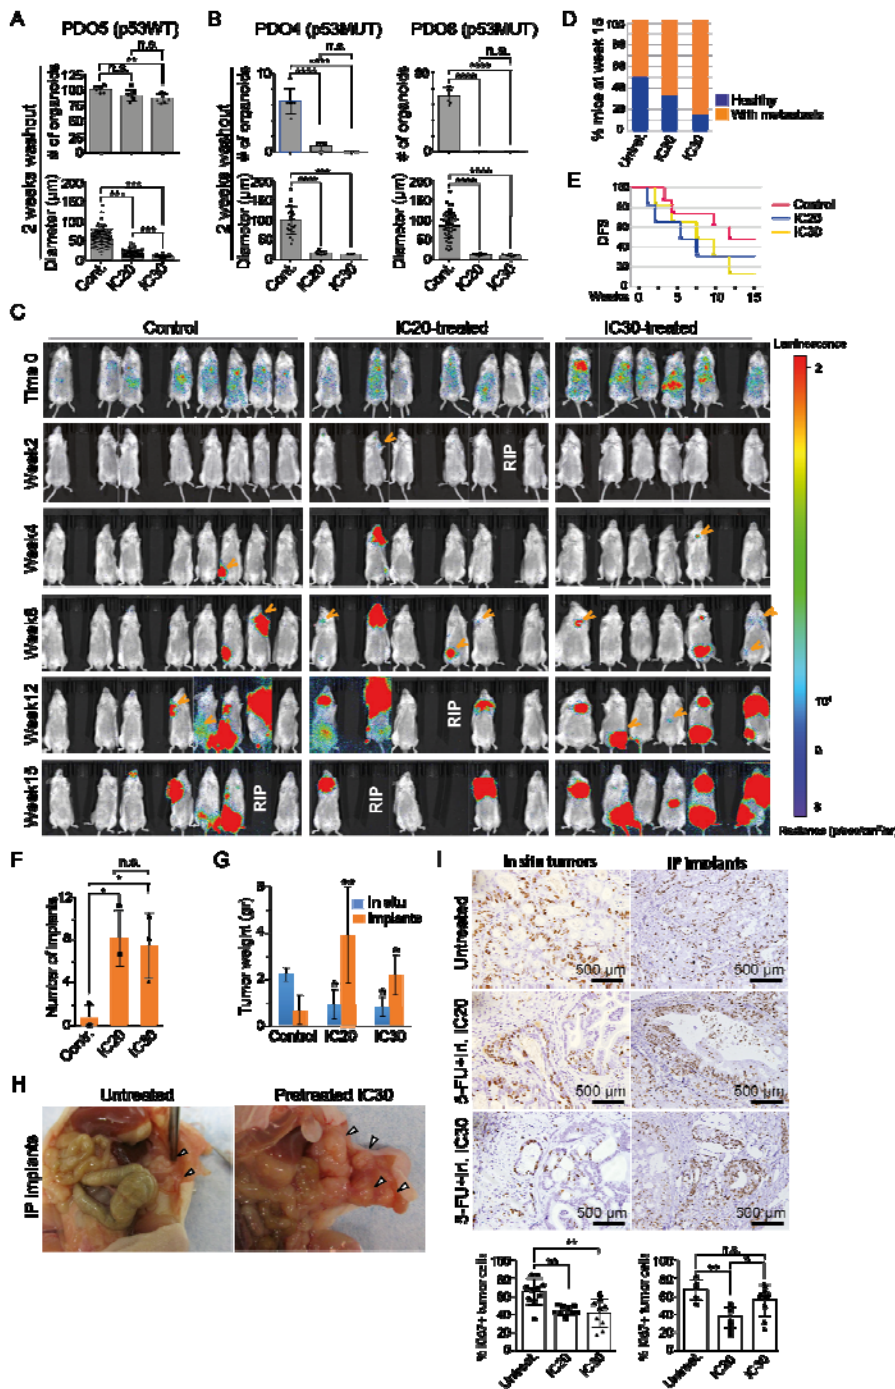

963

964

965

966

967

968 **Fig.5.**

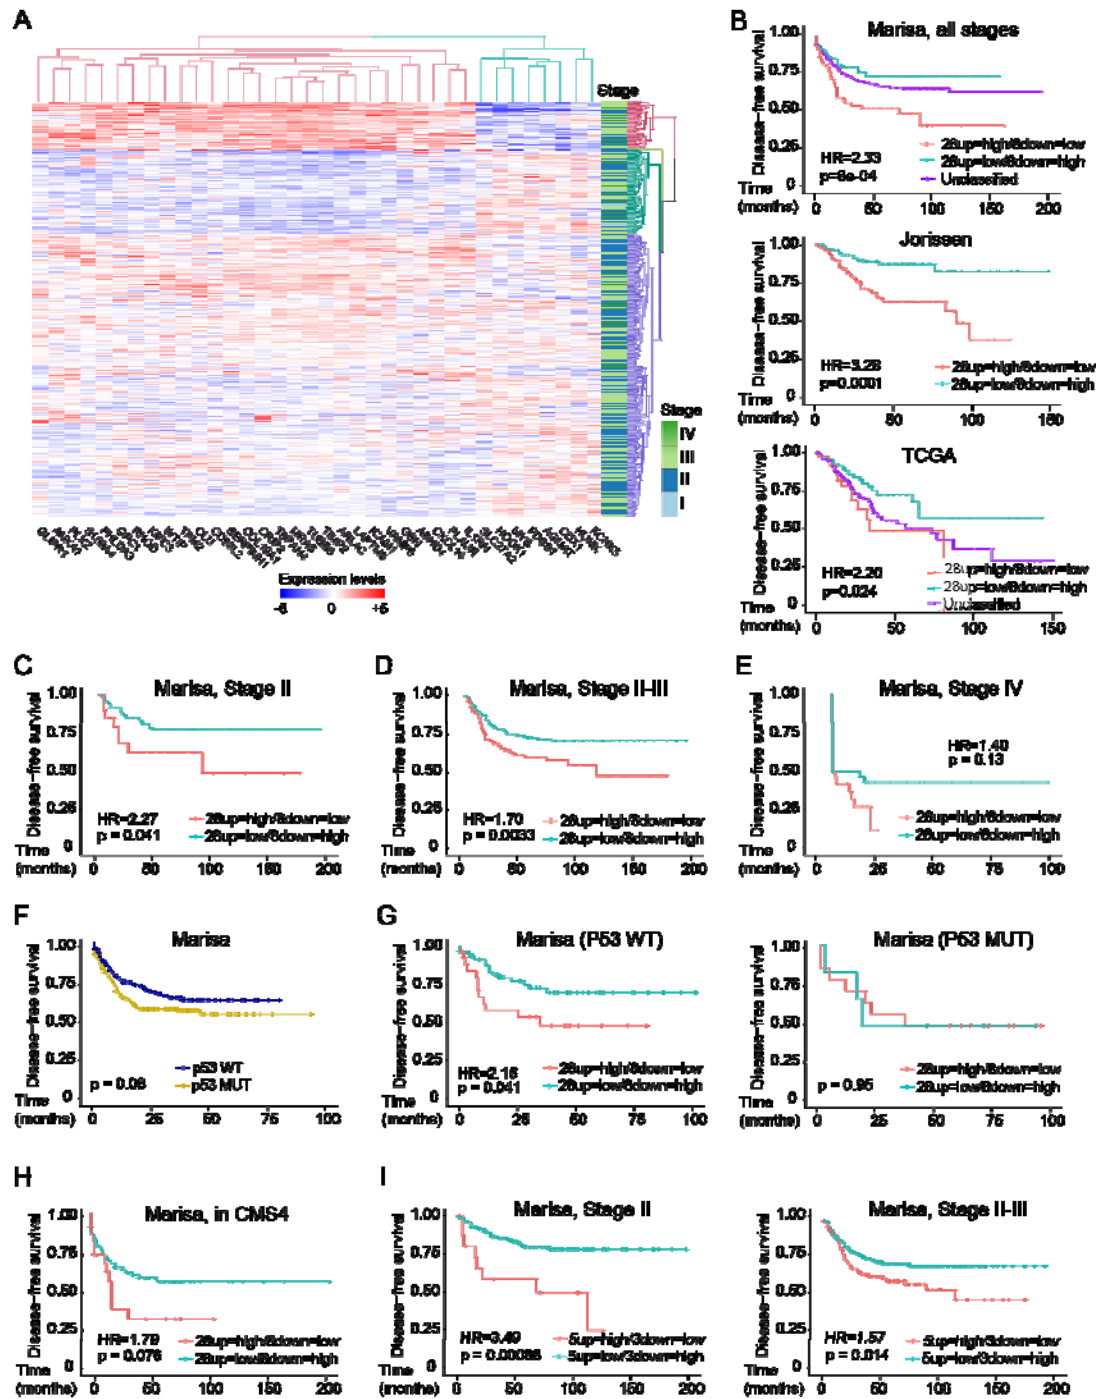

969

970

971



972 **Fig.6.**

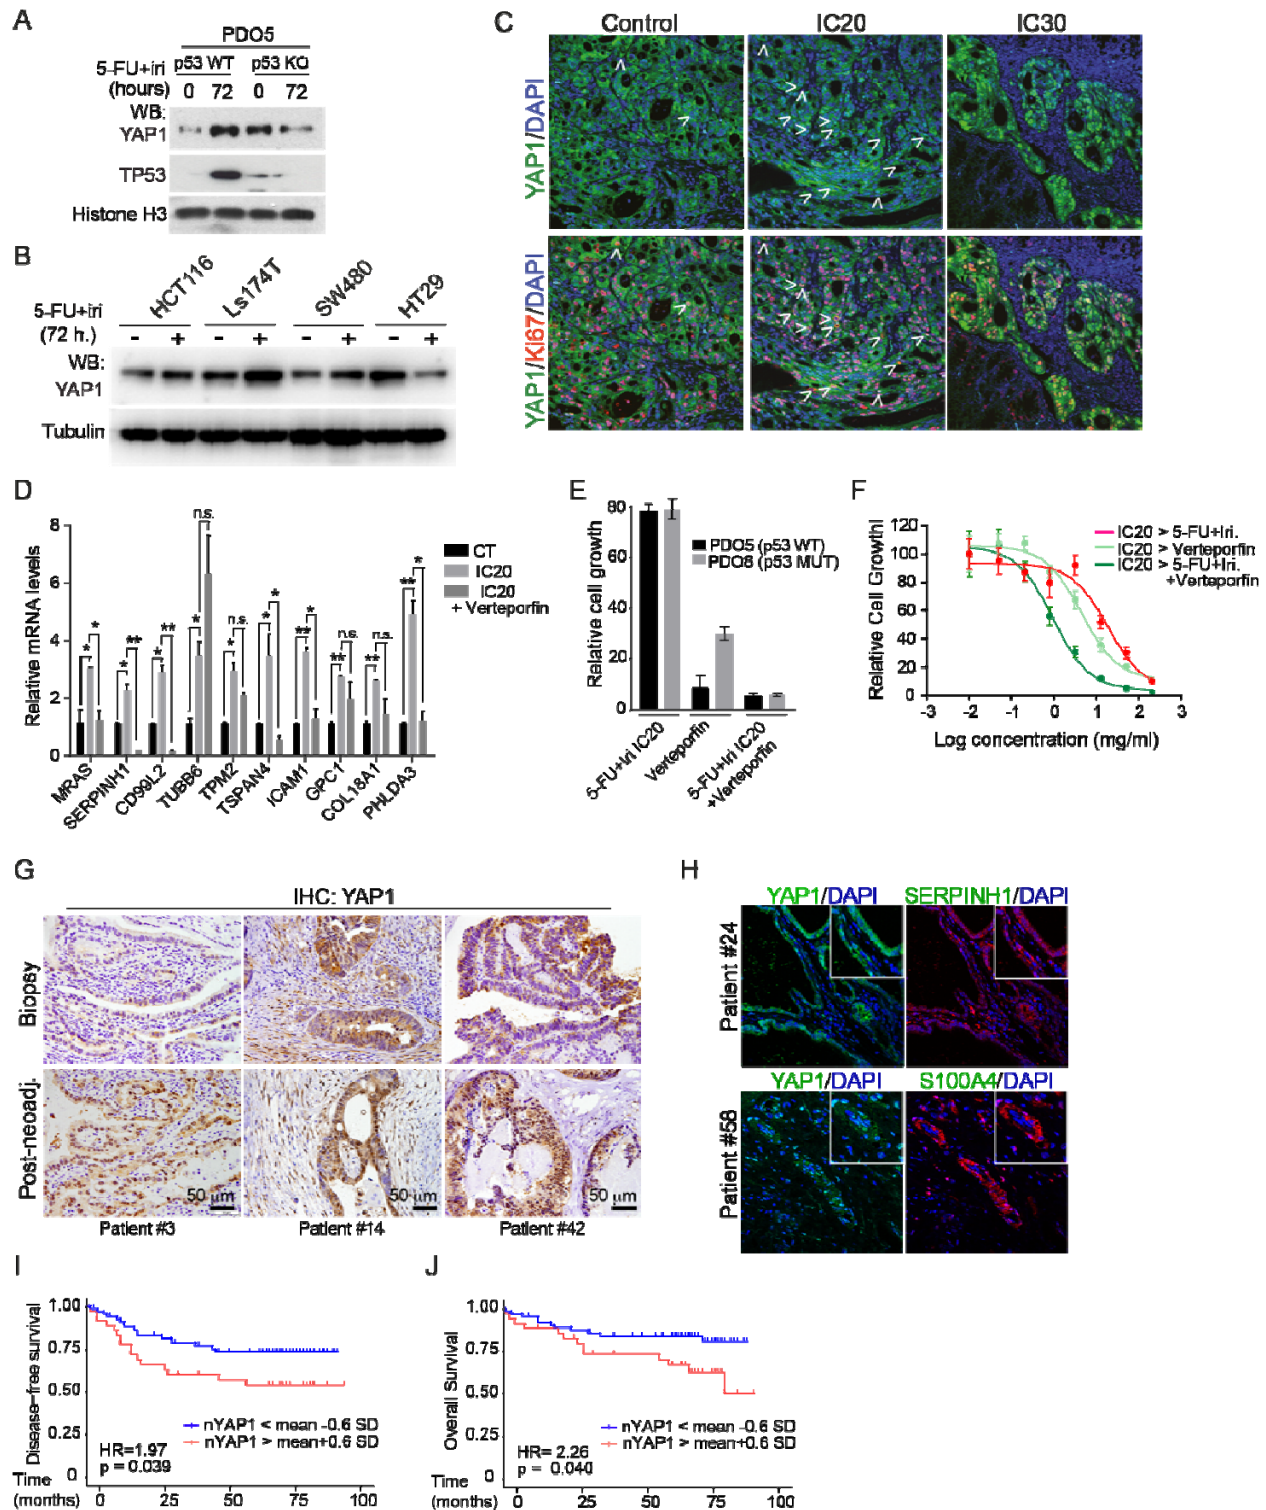

973

974

975

976

977

978



1 **Supplementary materials and methods:**

2

3 **Immunohistochemical staining**

4 Paraffin blocks were obtained from tissues and PDOs, previous fixation in 4%  
5 formaldehyde overnight at room temperature. Paraffin-embedded sections of 4  $\mu\text{m}$ , for  
6 tissues, and 2.5  $\mu\text{m}$ , for PDOs, were de-paraffinized, rehydrated and endogenous  
7 peroxidase activity was quenched (20 min, 1.5%  $\text{H}_2\text{O}_2$ ). EDTA or citrate-based antigen  
8 retrieval was used depending on the primary antibody used. All primary antibodies were  
9 diluted in PBS containing 0.05% BSA, incubated overnight at 4 °C and developed with  
10 the Envision+ System HRP Labelled Polymer anti-Rabbit or anti-Mouse and 3,3'-  
11 diaminobenzidine (DAB). Samples were mounted in DPX and images were obtained  
12 with an Olympus BX61 microscope.

13

14 **Immunofluorescence analysis**

15 For tissues and PDOs, the same protocol as IHC was followed. However, the samples  
16 were developed with Tyramide Signal Amplification System (TSA) and mounted in  
17 DAPI Fluoromount-G. Images were taken in an SP5 upright confocal microscope  
18 (Leica).

19

20 **Hematoxylin and eosin staining**

21 Previously de-paraffinized sections were incubated with hematoxylin 30 s, tap water 5  
22 min, 80% ethanol 0.15% HCl 30 s, water 30 s, 30% ammonia water ( $\text{NH}_3(\text{aq})$ ) 30 s,  
23 water 30 s, 96% ethanol 5 min, eosin 3 s, and absolute ethanol 1 min. Samples were  
24 dehydrated, mounted in DPX, and images were obtained with an Olympus BX61  
25 microscope.

26

27 **FISH**

28 Fluorescent in-situ hybridization (FISH) analyses from control and  $\text{IC}_{30}$ -treated PDOs  
29 were performed using commercial probes (Abbott Molecular Inc, Des Plaines, IL,  
30 USA), one including the centromeric alfa-satellite region specific for chromosome 8,  
31 and a second one containing locus-specific probes from the long arm of chromosome 13  
32 and 21.

33 In brief, we performed a cytospin to concentrate nuclei in the FISH slide. Slides were  
34 pre-treated with pepsin for 5 minutes at 37°C. Samples and probe were co-denatured  
35 at 80°C for five minutes and hybridized overnight at 37°C in a hot plate (Hybrite  
36 chamber, Abbot Molecular Inc.). Post-hybridization washes were performed at 73°C in  
37 2x sodium salt citrate buffer (SSC) and at room temperature in 2xSSC, 0.1% NP-40  
38 solution. Samples were counterstained with 4,6-diamino-2-phenylindole (DAPI)(Abbott  
39 Molecular Inc, Des Plaines, IL, USA). Results were analyzed in a fluorescence  
40 microscope (Olympus, BX51) using the Cytovision software (Applied Imaging, Santa  
41 Clara, CA). A minimum of 50 nuclei per case was analyzed.

42 **Comet assay**

43 Comet assays were performed using Comet Assay Kit following manufacturer's  
44 instructions. Pictures were taken using a Nikon Eclipse Ni-E epifluorescence  
45 microscope and tail moment was calculated using the OPENCOMET plugin for Fiji.

46

#### 47 **Annexin V binding assay**

48 Annexin V binding was determined by flow cytometry using the standard Annexin V  
49 Apoptosis Detection Kit APC. Single cells of treated PDOs with indicated combinations  
50 of 5-FU+Iri. were obtained and stained according to the manufacturer's instructions,  
51 with Propidium Iodide staining for the DNA content. The cells were analyzed in the  
52 Fortessa analyzer.

53

#### 54 **PDO initiating capacity assay**

55 For PDO Initiating Capacity assay, 300 or 600 single PDO cells were plated in 96-well  
56 plates in 10  $\mu$ L Matrigel. After 11 days in culture, the number of PDOs in each well was  
57 counted, photographs were taken for PDO diameter determination and cell viability was  
58 measured.

59

#### 60 **Chromatin-immunoprecipitation assay (ChIP)**

61 Control and IC20-treated PDOs were subjected to ChIP following standard procedures.  
62 Briefly, PDO cells were extracted with formaldehyde crosslinked for 10 min at room  
63 temperature and lysed for 20 min on ice with 500  $\mu$ L of H<sub>2</sub>O plus 10 mM Tris-HCl pH  
64 8.0, 0.25% Triton X-100, 10 mM EDTA, 0.5 mM EGTA, 20 mM  $\beta$ -glycerol-phosphate,  
65 100 mM NA-orthovanadate, 10 mM NaButyrate and complete protease inhibitor  
66 cocktail. The supernatants were sonicated, centrifuged at 13,000 rpm for 15 min, and  
67 supernatants were incubated overnight with anti-p53 antibody in RIPA buffer.  
68 Precipitates were captured with 35 mL of protein A-Sepharose, extensively washed and  
69 analysed by ChIP-qPCR. Primers used are listed in Supplementary Table S7. Inputs  
70 were used to normalize the ChIP-qPCR and samples were compared to control IgGs.

71

#### 72 **PDOs infection**

73 hFLiG plasmid was used for in vivo detection of metastasis, H2BeGFP plasmid was  
74 used for flow cytometry experiments and lentiCRISPR v2 was used for knock-out  
75 experiments. Three sgRNA against *TP53* gene were designed using Benchling  
76 (Supplementary Table S7). Lentiviral production was performed transfecting in  
77 HEK293T cells the lentiviral vectors and the plasmid of interest. One day after  
78 transfection, medium was changed, and viral particles were collected 24 hours later and  
79 then concentrated using Lenti-X Concentrator. PDOs were infected by resuspending  
80 single cells in concentrated virus diluted in complete medium, centrifuged for 1 h at 650  
81 rcf, and incubated for 5 hours at 37°C. Cells were then washed in complete culture  
82 medium and seeded as described above.

83

#### 84 **Description of the patient gene expression data sets**

85 Transcriptomic and available clinical data datasets from colorectal, breast, prostate and  
86 lung cancer were downloaded from the open-access resource CANCECTOOL. For

87 CRC we used the Marisa (GSE39582) data set, which includes expression and clinical  
88 data for 566 patients with CRC and 19 non-tumoral colorectal mucosa, and the Jorissen  
89 (GSE14333) data set and the TCGA data set with expression and clinical data of 226  
90 and 329 CRC patients, respectively. For Lung cancer we used the Okayama  
91 (GSE31210) data set, which includes expression profiles of 226 lung adenocarcinomas  
92 and the TCGA data set with 434 patients.

93

#### 94 **Association of the signatures with clinical outcome**

95 Association of the signatures expression with relapse was assessed in the cancer  
96 transcriptomic data sets using a Kaplan-Meier estimates and Cox proportional hazard  
97 models. A standard log-rank test was applied to assess significance between groups.  
98 This test was selected because it assumes the randomness of the possible censorship. All  
99 the survival analyses and graphs were performed with R using the survival (v.3.2-3) and  
100 survminer (v.0.4.8) packages and a p-value<0.05 was considered statistically significant  
101 (see Supplementary Table S4).

102

#### 103 **Supplementary figures and tables:**

104 Fig. S1. Low-dose CT treatment induces a quiescent-like state to CRC PDO in the  
105 absence of persistent DNA damage and senescence.

106 Fig. S2. Low-dose CT induces a robust p53 signaling.

107 Fig. S3. p53 and p21 dependency of the feISC signature.

108 Fig. S4. TQL cells retain tumor initiating capacity.

109 Fig. S5. Identification of a fetal ISC signature with prognostic value in cancer.

110 Fig. S6. Acquisition of quiescent phenotype by CT treatment in patients.

111 Table S1. Patient-derived organoids used in this study.

112 Table S2. Differentially expressed genes between IC20 or IC30 and control PDOs.

113 Table S3. Expression correlation matrix from CT induced feISC genes in the Marisa  
114 (Marisa et al., 2013) dataset.

115 Table S4. Cox proportional hazards analysis of the feISC signature.

116 Table S5. Positive correlation of individual genes to the rest of the cohort.

117 Table S6. Human gastrointestinal tumor samples used in this study.

118 Table S7. List of oligonucleotides for RT-qPCR and ChIP-qPCR and sgRNA for  
119 CRISPR/Cas9 knockout used in this study.

120 Table S8. Materials table.

121

122

123

124

125

126  
127  
128  
129

**Fig. S1.**

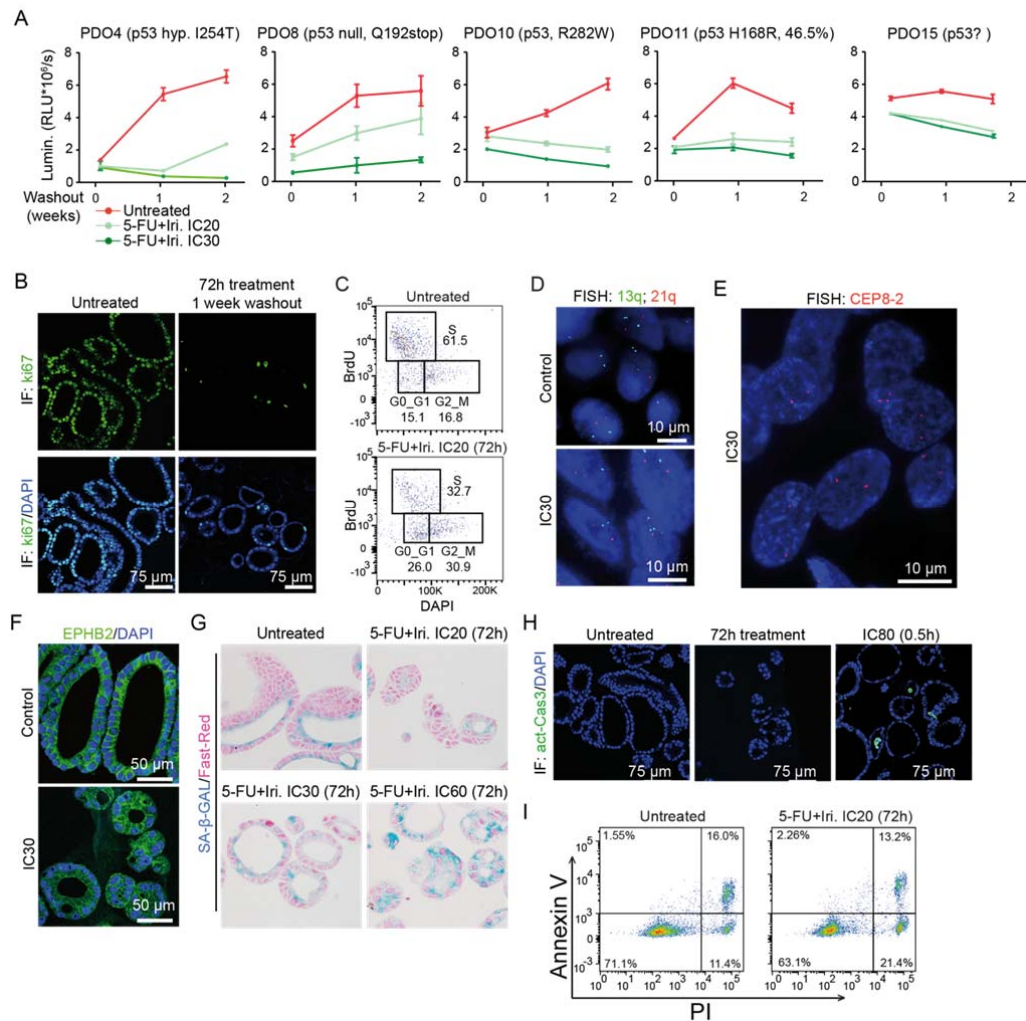

130  
131

**Figure S1. Related to Figure 1. Low-dose CT treatment induces a quiescent-like state to CRC PDO in the absence of persistent DNA damage and senescence.**

(A) Quantification of cell viability of the different PDOs untreated or pretreated with 5-FU+Iri. for 72 hours and then maintained in fresh medium for 1 and 2 weeks after washout. (B) Representative images of the proliferation marker ki67 staining by IF in PDO5 tumoroid treated with 5-FU+Iri. at IC<sub>20</sub> for 72 hours and after being maintained in fresh medium for 1 week. (C) Flow cytometry analysis showing BrdU incorporation of PDO5 after 72 hours of 5-FU+Iri. treatment, compared with the control. Three boxes are shown, representing cells in G<sub>0</sub>/G<sub>1</sub>, S and G<sub>2</sub>/M cell cycle, respectively. (D and E) Representative images of fluorescent in-situ hybridization (FISH) analysis from control and IC<sub>30</sub>-treated PDO5 using probes for (D) 13q (green) and 21q (red) and (E) the centromeric probe CEP8-2 (red). (F) Representative images of IF analysis using the surface marker EPHB2 in control and IC<sub>30</sub>-treated PDO5 tumoroid. DAPI is used as a

145 nuclear marker. (G) Analysis of SA- $\beta$ -Gal activity in PDO5 cells treated with 5-FU+Iri.  
146 as indicated for 72 hours. Representative images were obtained with Olympus BX61.  
147 (H) Representative IF images of cleaved-caspase 3 staining in PDO5 treated with 5-  
148 FU+Iri. at IC<sub>20</sub> at the indicated time points and with IC<sub>80</sub> as a positive control. (I)  
149 Cytometry analysis of Annexin V binding in PDO5 untreated or treated as indicated.  
150 SA- $\beta$ -Gal, SA- $\beta$ -Galactosidase; 5-FU, 5-fluorouracil; Iri, irinotecan; CT, control; IC<sub>20</sub>  
151 and IC<sub>30</sub>, 5-FU+Iri. treatment that results in 20% and 30% cell death, respectively,  
152 compared with untreated cell growth.

153

154

155 **Fig. S2.**

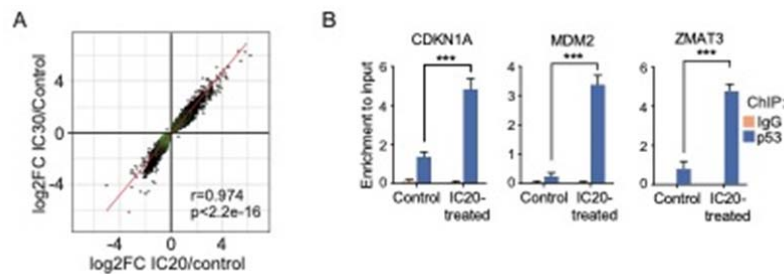

156

157

158 **Figure S2. Related to Figure 2. Low-dose CT induces a robust p53 signaling.**

159 (A) Linear association of the genes differentially expressed in treated PDO5 compared  
160 with the control. Dots represent the log<sub>2</sub> fold change values of genes for IC<sub>20</sub> compared  
161 with control (x-axis) and IC<sub>30</sub> compared with control (y-axis). The Pearson correlation  
162 and p value are shown. (B) ChIP-qPCR analysis of p53 binding in untreated and IC<sub>20</sub>-  
163 treated PDO5 in a subset of putative p53 target genes expressed as relative enrichment  
164 normalized to the input.

165 The statistical analysis in (B) was performed by T-Student test, comparing treated with  
166 untreated condition. p values are indicated as \*\*\*\*p < 0.0001. CT, IC<sub>20</sub> and IC<sub>30</sub>, 5-  
167 FU+Iri. treatment that results in 20% and 30% cell death, respectively, compared with  
168 untreated cell growth.

169

170

171

172

173

174

175

176

177

178

179

180

181

182  
183  
184  
185

**Fig. S3.**

Figure S3. p53 dependency of the feISC signature

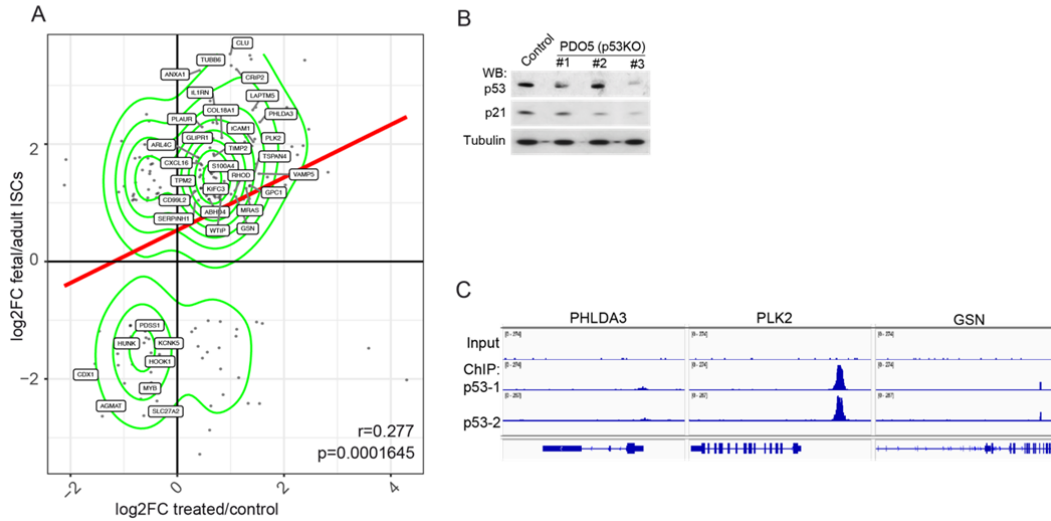

186  
187  
188  
189  
190  
191  
192  
193  
194  
195  
196  
197  
198  
199  
200

**Figure S3. Related to Figure 3. p53 and p21 dependency of the feISC signature.**

(A) Scatter plot and linear regression line of the genes differentially expressed between CT treated and control PDOs and fetal compared with adult intestinal stem cell. Dots represent the log<sub>2</sub> fold change values of genes for treated versus control (x-axis) and fetal versus adult intestinal stem cell (y-axis). The Pearson correlation and p value are shown. Genes included in the 28up+8down-feISC signature are indicated. (B) WB analysis of p53 levels and its downstream target p21 in CRISPR-Cas9-engineered p53 KO pools. (C) Representation of some 28up-feISC genes distribution in the indicated genomic regions obtained from ChIP-seq analysis in IC<sub>20</sub>-treated PDO5 (n=2).



201 **Fig. S4.**

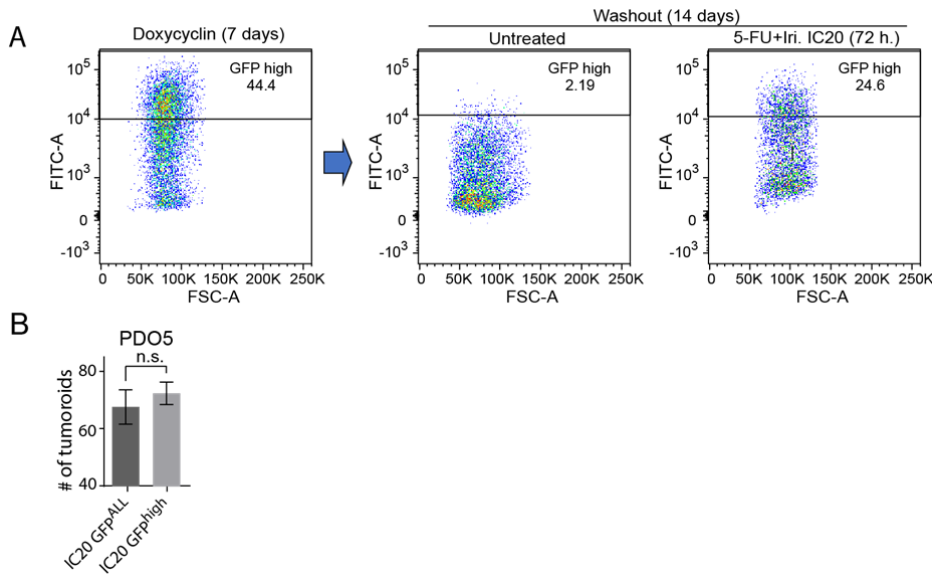

202  
203

204 **Figure S4. Related to Figure 4. TQL cells retain tumor initiating capacity.**

205 (A) Analysis of GFP distribution by flow cytometry of PDO5 cells carrying a  
206 doxycycline-inducible GFP-H2B construct. Cells were treated for 6 days with  
207 doxycycline to induce GFP-H2B expression and then left untreated or treated with 5-  
208 FU+Iri. IC<sub>30</sub> for 72 hours and maintained in fresh medium for 2 additional weeks.  
209 Quiescent cells that retained high or low GFP levels were purified by cell sorting. (B)  
210 Number of PDOs generated from seeding 300 GFP<sup>high+low</sup> and GFP<sup>high</sup> sorted cells after  
211 2 weeks with fresh medium.

212 n.s., no significant; IC<sub>20</sub>, 5-FU+Iri. treatment that results in 20% cell death, compared  
213 with untreated cell growth.

214  
215  
216  
217  
218  
219  
220  
221  
222  
223  
224  
225  
226  
227  
228  
229  
230

231 **Fig. S5.**

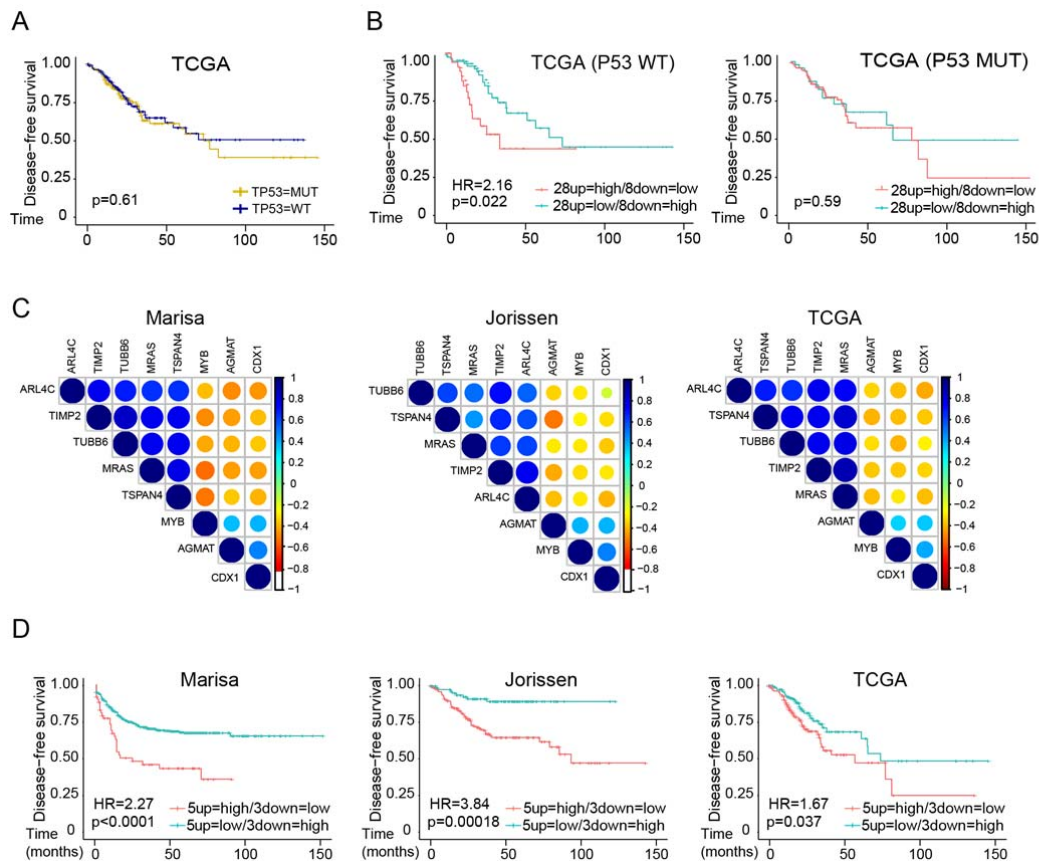

232

233

234

235

236 **Figure S5. Related to Figure 5. Identification of a fetal ISC signature with**  
 237 **prognostic value in cancer.**

238 (A) Kaplan-Meier representation of disease-free survival probability over time of  
 239 patients classified according to their *TP53* status (*TP53* WT  $n=144$  and *TP53* MUT  
 240  $n=177$ ) in the TCGA colorectal cancer dataset. (B) Kaplan-Meier representation of  
 241 disease-free survival probability over time of patients, from the TCGA dataset,  
 242 classified according to their cluster analysis of the 28up+8down-feISC signature (data  
 243 not shown) for patient groups from *TP53* WT (28up=high/8down=low  $n=47$  and  
 244 28up=low/8down=high  $n=97$ ) and *TP53* mutant (28up=high/8down=low  $n=128$  and  
 245 28up=low/8down=high  $n=49$ ). (C) Expression correlation matrix according to the  
 246 5up+3down-feISC signature in the Marisa, Jorissen and TCGA datasets. Positive and  
 247 negative correlation is shown in blue and red, respectively. The size of circles and color  
 248 intensity are proportional to the Pearson correlation coefficient found for each gene pair.  
 249 (D) Kaplan-Meier curves of disease-free survival probability over time of patients  
 250 classified according to their cluster analysis of the 28up+8down-feISC signature (data  
 251 not shown), for Marisa (5up=high/3down=low  $n=59$  and 5up=low/3down=high  
 252  $n=507$ ), Jorissen (5up=high/3down=low  $n=137$  and 5up=low/3down=high  $n=89$ ) and

253 TCGA (5up=high/3down=low  $n=128$  and 5up=low/3down=high  $n=105$ ) colorectal  
 254 databases.

255 For statistical analysis of the Kaplan-Meier estimates we used Cox proportional hazards  
 256 models (See Supplementary Table S4). HR, hazard ratio.; p, p-value.

257

258

259 **Fig. S6.**

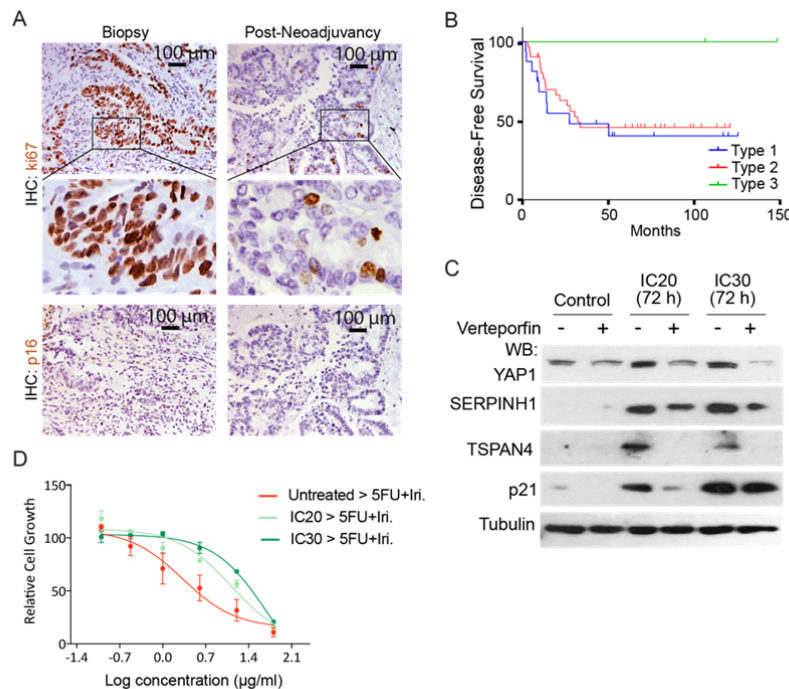

260

261 **Figure S6. Related to Figure 6. Acquisition of quiescent phenotype by CT**  
 262 **treatment in patients. (A)** IHC analysis of Ki67 and p16 in representative type 2  
 263 colorectal tumor samples (Table S6 #17) from the same patient at diagnosis (biopsy)  
 264 and after neoadjuvant therapy at the time of surgery (post-neoadjuvancy). **(B)** Disease-  
 265 free survival analysis (Kaplan-Meier curves) of patients stratified according to ki67-  
 266 related tumor type. **(C)** WB analysis of control and treated *TP53* WT Ls174T CRC cells  
 267 collected after 24 hours of 5-FU+Iri. treatment alone or in combination with the YAP1  
 268 inhibitor verteporfin at a final concentration of 5  $\mu\text{M}$ . **(D)** Dose-response assay of  
 269 PDO5 cells untreated or previously treated for 72 hours with IC<sub>20</sub>-IC<sub>30</sub> 5-FU+Iri.

270

271

272

273

1  
2  
3  
4  
5

**Supplementary Table S1. Patient-derived organoids used in this study.**  
The mutations and the corresponding chemotherapy concentrations that reduce a 20 and 30% of the cell growth (IC20 and IC30, respectively) are indicated for each PDO.

| <b>PDO</b>   | <b>Mutations</b>                                                                                                                                                                        | <b>IC20 (µg/mL)</b>     | <b>IC30 (µg/mL)</b>     |
|--------------|-----------------------------------------------------------------------------------------------------------------------------------------------------------------------------------------|-------------------------|-------------------------|
| <b>PDO4</b>  | TP53 I254T (100%)<br>EGFR S464L (97.21%)                                                                                                                                                | 5-FU 1.25<br>Iri. 0.50  | 5-FU 2.00<br>Iri. 0.80  |
| <b>PDO5</b>  | KRAS G12D (66.43%)                                                                                                                                                                      | 5-FU 0.14<br>Iri.] 0.06 | 5-FU 0.25<br>Iri. 0.10  |
| <b>PDO8</b>  | TP53 Q192stop (98.46%)<br>KRAS G13C (67.27%)                                                                                                                                            | 5-FU 0.78<br>Iri. 0.31  | 5-FU 1.56<br>Iri. 0.63  |
| <b>PDO10</b> | TP53 R282W (99.82)<br>FGFR2 C809W (62.72%)<br>KRAS A146V (80.25%)                                                                                                                       | 5-FU 6.25<br>Iri. 2.50  | 5-FU 12.50<br>Iri. 5.00 |
| <b>PDO11</b> | TP53 H168R (46.54%)<br>FGFR2 N194stop (45.87%)<br>KRAS G12D (49.58%)<br>ERBB2 A87T (4.76%)<br>PIK3CA S874N (41.93%)<br>PDGFRA R293H (5.97%)<br>EGFR K960R (46.3%)<br>BRAF E71D (42.08%) | 5-FU 0.78<br>Iri. 0.31  | 5-FU 1.56<br>Iri. 0.63  |
| <b>PDO15</b> | TP53 G262V (98.82%)                                                                                                                                                                     | 5-FU 1.56<br>Iri. 0.63  | 5-FU 3.13<br>Iri. 1.25  |
| <b>PDO66</b> | NRAS (G12S) (99.05%)<br>APC (S1110stop) (99.80)                                                                                                                                         | 5-FU 0.63<br>Iri. 0.30  | 5-FU 2.50<br>Iri. 1.00  |

- 1 **Table S4 Cox proportional hazards analysis of the feISC signature.**
- 2 Association of the signature with recurrence-disease free survival. Related to
- 3 Figure 4 and Figure S4.
- 4

| Cluster                                              |                |  | p value<br>(logrank test) | HR<br>recurrence | lower.95<br>(HR) | upper.95<br>(HR) |
|------------------------------------------------------|----------------|--|---------------------------|------------------|------------------|------------------|
| <b>GSE39582 (Marisa et al) (n=566 patients)</b>      |                |  |                           |                  |                  |                  |
| <b>28up=high/8down=low</b>                           |                |  |                           |                  |                  |                  |
| All stages                                           | <i>n</i> = 66  |  | 8.00E-04                  | 2.33             | 1.40             | 3.9              |
| Stage II                                             | <i>n</i> = 23  |  | 4.10E-02                  | 2.27             | 1.01             | 5.1              |
| Stage II-III                                         | <i>n</i> = 100 |  | 3.30E-03                  | 1.71             | 1.19             | 2.5              |
| Stage IV                                             | <i>n</i> = 25  |  | 2.37E-01                  | 1.48             | 0.77             | 2.8              |
| p53WT                                                | <i>n</i> = 27  |  | 4.67E-02                  | 2.16             | 1.01             | 4.6              |
| p53MUT                                               | <i>n</i> = 6   |  | 9.60E-01                  | 1.04             | 0.27             | 4.0              |
| <b>5up=high/3down=low</b>                            |                |  |                           |                  |                  |                  |
| All stages                                           | <i>n</i> = 59  |  | 3.00E-05                  | 2.27             | 1.53             | 3.4              |
| Stage II                                             | <i>n</i> = 17  |  | 9.00E-04                  | 3.49             | 1.60             | 7.7              |
| Stage II-III                                         | <i>n</i> = 87  |  | 2.41E-02                  | 1.57             | 1.06             | 2.3              |
| CMS4                                                 | <i>n</i> = 23  |  | 7.60E-02                  | 1.79             | 0.92             | 3.46             |
| <b>TCGA-COAD+READ (TCGA Portal) (n=329 patients)</b> |                |  |                           |                  |                  |                  |
| <b>28up=high/8down=low</b>                           |                |  |                           |                  |                  |                  |
| All stages                                           | <i>n</i> = 39  |  | 2.40E-02                  | 2.20             | 1.09             | 4.43             |
| P53WT                                                | <i>n</i> = 47  |  | 2.10E-02                  | 2.16             | 1.1              | 4.20             |
| P53MUT                                               | <i>n</i> = 128 |  | 5.90E-02                  | 1.18             | 0.63             | 2.21             |
| <b>5up=high/3down=low</b>                            |                |  |                           |                  |                  |                  |
| All stages                                           | <i>n</i> = 128 |  | 3.70E-02                  | 1.67             | 1.03             | 2.72             |
| P53 WT                                               | <i>n</i> = 144 |  | 6.08E-01                  | 0.89             | 0.58             | 1.37             |
| <b>GSE14333 (Jorissen et al) (n=226 patients)</b>    |                |  |                           |                  |                  |                  |
| <b>28up=high/8down=low</b>                           |                |  |                           |                  |                  |                  |
| All stages                                           | <i>n</i> = 114 |  | 1.00E-04                  | 3.28             | 1.74             | 6.18             |
| <b>5up=high/3down=low</b>                            |                |  |                           |                  |                  |                  |
| All stages                                           | <i>n</i> = 137 |  | 2.00E-4                   | 3.84             | 1.80             | 8.21             |

5

6



- 1 **Table S5 Positive correlation of individual genes to the rest of the cohort.**  
 2 Genes within the 5up+3down-felSC signature are highlighted in gray. Related  
 3 to Figure 5 and S5.  
 4

| Gene     | State | GSE39582<br>(Marisa et al) | TCGA-<br>COAD+READ<br>(TCGA Portal) | GSE14333<br>(Jorissen et al) | Final Score |
|----------|-------|----------------------------|-------------------------------------|------------------------------|-------------|
| ABHD4    | up    | 9,69                       | 9,39                                | 7,31                         | 26,39       |
| ANXA1    | up    | 9,44                       | 11,85                               | 8,82                         | 30,12       |
| ARL4C    | up    | 13,77                      | 14,96                               | 12,84                        | 41,57       |
| CD99L2   | up    | 9,48                       | 9,65                                | 4,87                         | 23,99       |
| CLU      | up    | 10,84                      | 9,07                                | 9,18                         | 29,09       |
| COL18A1  | up    | 14,22                      | 14,74                               | 10,80                        | 39,76       |
| CRIP2    | up    | 13,76                      | 14,17                               | 9,11                         | 37,04       |
| CXCL16   | up    | 8,12                       | 7,54                                | 8,59                         | 24,25       |
| GLIPR1   | up    | 8,08                       | 9,84                                | 9,18                         | 27,10       |
| GPC1     | up    | 11,18                      | 11,40                               | 8,45                         | 31,03       |
| GSN      | up    | 9,85                       | 11,30                               | 3,41                         | 24,56       |
| ICAM1    | up    | 12,82                      | 13,66                               | 9,16                         | 35,64       |
| IL1RN    | up    | 9,70                       | 9,66                                | 7,92                         | 27,28       |
| KIFC3    | up    | 10,77                      | 14,54                               | 3,25                         | 28,57       |
| LAPTM5   | up    | 13,56                      | 14,90                               | 11,43                        | 39,88       |
| MRAS     | up    | 15,43                      | 16,61                               | 10,53                        | 42,57       |
| PHLDA3   | up    | 11,92                      | 12,29                               | 5,69                         | 29,90       |
| PLAUR    | up    | 11,48                      | 10,39                               | 10,19                        | 32,07       |
| PLK2     | up    | 9,78                       | 10,16                               | 8,90                         | 28,84       |
| RHOD     | up    | 8,63                       | 4,08                                | 7,79                         | 20,50       |
| S100A4   | up    | 11,56                      | 10,19                               | 9,35                         | 31,09       |
| SERPINH1 | up    | 13,66                      | 13,66                               | 10,22                        | 37,53       |
| TIMP2    | up    | 15,72                      | 16,68                               | 13,80                        | 46,21       |
| TPM2     | up    | 11,24                      | 13,25                               | 8,91                         | 33,41       |
| TSPAN4   | up    | 15,69                      | 16,26                               | 12,19                        | 44,15       |
| TUBB6    | up    | 15,37                      | 15,78                               | 11,66                        | 42,81       |
| VAMP5    | up    | 13,26                      | 14,07                               | 7,73                         | 35,06       |
| WTIP     | up    | 8,59                       | 12,75                               | 5,23                         | 26,57       |
| AGMAT    | down  | 3,74                       | 3,21                                | 3,32                         | 10,28       |
| CDX1     | down  | 3,61                       | 3,13                                | 3,37                         | 10,12       |
| HOOK1    | down  | 3,42                       | 2,93                                | 3,12                         | 9,47        |
| HUNK     | down  | 2,73                       | 2,72                                | 2,74                         | 8,18        |
| KCNK5    | down  | 2,60                       | 2,39                                | 2,49                         | 7,48        |
| MYB      | down  | 3,62                       | 3,46                                | 3,50                         | 10,58       |
| PDSS1    | down  | 3,46                       | 2,98                                | 2,42                         | 8,86        |
| SLC27A2  | down  | 2,69                       | 2,12                                | 2,22                         | 7,03        |

### Supplementary Table S6. Human gastrointestinal tumor samples used in this study.

Paired samples at diagnosis (biopsy) and after neoadjuvant therapy at the time of surgery (postQ). The corresponding clinical data, ki67 subtype classification and presence of nuclear YAP1 is indicated.

**Relapse**  
0. Regression  
1. Local recurrence  
2. Metastasis

**Status**  
1. Alive without disease  
2. Alive with disease  
3. Dead without disease  
4. Dead with disease

**ki67 subtype**  
1. No changes in ki67 levels  
2. Decrease in ki67 levels  
3. Decrease in ki67 levels displaying giant nuclei

| Patient nº | Tumor Localization | Clinical TNM | Treatment                       | ki67% postQ | ki67% biopsy | ki67 subtype | nuclear YAP1% postQ | nuclear YAP1% biopsy | OS (mo) | DFS (mo) |
|------------|--------------------|--------------|---------------------------------|-------------|--------------|--------------|---------------------|----------------------|---------|----------|
| 1          | Gastric            | T4N1M1       | Chemotherapy                    | 20          | 40           | 2            | 30                  | 0                    | 7,13    | 5,40     |
| 2          | Colorectal         | T3N1M1       | Chemotherapy + Targeted therapy | 1           | 55           | 3            | N/A                 | N/A                  | 115,23  | 115,23   |
| 3          | Gastric            | T3N1         | Chemotherapy                    | 10          | 70           | 2            | 90                  | 5                    | 60,90   | 60,90    |
| 4          | Colorectal         | T3N1M1       | Radiotherapy                    | 5           | 70           | 2            | N/A                 | N/A                  | 17,33   | 9,50     |
| 5          | Gastric            | T3N1M0       | Chemotherapy                    | 5           | 60           | 2            | 80                  | 5                    | 26,73   | 12,23    |
| 6          | Colorectal         | T3N0         | Chemotherapy                    | 30          | 70           | 2            | 50                  | 2                    | 53,10   | 53,10    |
| 7          | Gastric            | T3N1M1       | Chemotherapy                    | 70          | 90           | 2            | 90                  | 80                   | 41,10   | 23,07    |
| 8          | Gastric            | T3N1M1       | Chemotherapy + Targeted therapy | 10          | 5            | 1            | 70                  | 0                    | 89,83   | 40,23    |
| 9          | Colorectal         | T3N1         | Chemotherapy                    | 15          | 75           | 2            | N/A                 | N/A                  | 94,23   | 94,23    |
| 10         | Gastric            | T3N0M0       | Chemotherapy                    | 85          | 95           | 1            | 5                   | 10                   | 91,10   | 91,10    |
| 11         | Gastric            | T2-3N1M0     | Chemotherapy                    | 90          | 90           | 1            | N/A                 | N/A                  | 93,37   | 93,37    |
| 12         | Gastric            | T3N1M0       | Chemotherapy                    | 80          | 90           | 1            | N/A                 | N/A                  | 97,70   | 97,70    |
| 13         | Gastric            | T3N0M0       | Chemotherapy                    | 20          | 70           | 2            | 0                   | 0                    | 25,23   | 9,67     |
| 14         | Colorectal         | T4N1         | Chemotherapy                    | 80          | 60           | 1            | 95                  | 20                   | 38,17   | 12,43    |
| 15         | Gastric            | T3N1M1       | Chemotherapy + Targeted therapy | 70          | 85           | 1            | 50                  | 15                   | 93,37   | 93,37    |
| 16         | Colorectal         | T3N1         | Chemotherapy + Targeted therapy | 10          | 80           | 2            | 90                  | 0                    | 42,67   | 21,67    |
| 17         | Colorectal         | T4N1M0       | Chemotherapy                    | 20          | 95           | 2            | 60                  | 20                   | 39,90   | 39,90    |
| 18         | Colorectal         | T3N0M0       | Chemotherapy                    | 40          | 90           | 2            | N/A                 | N/A                  | 81,53   | 81,53    |
| 19         | Colorectal         | T2N1M0       | Chemotherapy                    | 5           | 25           | 3            | 90                  | 3                    | 83,13   | 83,13    |
| 20         | Colorectal         | T4N1M0       | Chemotherapy                    | 20          | 60           | 2            | 70                  | 60                   | 94,03   | 94,03    |
| 21         | Colorectal         | T3N1M0       | Chemotherapy                    | 25          | 80           | 2            | N/A                 | 30                   | 91,90   | 91,90    |
| 22         | Colorectal         | T3N1M0       | Chemotherapy                    | 1           | 95           | 2            | N/A                 | N/A                  | 88,30   | 88,30    |
| 23         | Colorectal         | T3N2bM0      | Chemotherapy                    | 1           | 90           | 2            | 30                  | 30                   | 76,53   | 76,53    |
| 24         | Gastric            | T3N1M0       | Chemotherapy                    | 20          | 20           | 1            | 90                  | 0                    | 29,87   | 12,77    |
| 25         | Colorectal         | T3N1M0       | Chemotherapy                    | N/A         | N/A          | N/A          | N/A                 | N/A                  | 79,77   | N/A      |
| 26         | Colorectal         | T3N0M0       | Chemotherapy                    | N/A         | N/A          | N/A          | N/A                 | N/A                  | 53,63   | N/A      |
| 27         | Colorectal         | T3N0M0       | Chemotherapy                    | 1           | 55           | 2            | 5                   | 10                   | 8,53    | 8,53     |
| 28         | Colorectal         | T3N1M0       | Chemotherapy + Targeted         | 40          | 65           | 2            | 30                  | 1                    | 121,23  | 27,47    |

| therapy |            |                                   |                                 |     |     |     |     |     |       |       |
|---------|------------|-----------------------------------|---------------------------------|-----|-----|-----|-----|-----|-------|-------|
| 29      | Colorectal | T3N1M0                            | Chemotherapy                    | N/A | N/A | N/A | N/A | N/A | 33,90 | 20,83 |
| 30      | Colorectal | T3N0                              | Chemotherapy                    | 20  | 10  | 1   | 70  | 3   | 60,30 | 60,30 |
| 31      | Gastric    | T3N0                              | Chemotherapy                    | 20  | 30  | 1   | 100 | 0   | 12,17 | 9,10  |
| 32      | Gastric    | T3N1                              | Chemotherapy                    | 30  | 40  | 1   | N/A | N/A | 16,53 | 8,40  |
| 33      | Gastric    | T3N0M0                            | Chemotherapy                    | 30  | 70  | 2   | 80  | 5   | 77,93 | 77,93 |
| 34      | Colorectal | T3N1M1                            | Chemotherapy + Targeted therapy | 5   | 80  | 2   | 90  | 0   | N/A   | N/A   |
| 35      | Colorectal | T3N1M0                            | Radiotherapy                    | 1   | 60  | 2   | 100 | 15  | 69,50 | 69,50 |
| 36      | Gastric    | T3N1M0                            | Chemotherapy                    | 25  | N/A | N/A | N/A | N/A | 39,37 | 39,37 |
| 37      | Gastric    | T3N1M0                            | Chemotherapy                    | 20  | 55  | 2   | 2   | 2   | 65,10 | 65,10 |
| 38      | Gastric    | T3N1M0                            | Chemotherapy                    | 10  | 20  | 1   | 60  | 20  | 39,23 | 22,73 |
| 39      | Pancreas   | T4N0M0                            | Chemotherapy                    | 0   | N/A | N/A | N/A | N/A | 45,63 | 15,63 |
| 40      | Colorectal | T3N1M1                            | Chemotherapy                    | 25  | 30  | 1   | 90  | 10  | 18,23 | 6,00  |
| 41      | Colorectal | T3N0M0                            | Radiotherapy                    | 25  | 40  | 1   | 30  | 0   | 41,77 | 41,77 |
| 42      | Colorectal | T3N0M1                            | Chemotherapy + Targeted therapy | 40  | 90  | 2   | 90  | 0   | 22,50 | 10,13 |
| 43      | Colorectal | T4N1M0                            | Chemotherapy                    | 0   | 65  | 2   | 0   | 5   | 45,60 | 11,90 |
| 44      | Colorectal | T3N1                              | Chemotherapy                    | 5   | 15  | 1   | 0   | 5   | 8,70  | 8,70  |
| 45      | Colorectal | T3N0M0                            | Chemotherapy                    | 1   | 70  | 2   | N/A | N/A | 62,73 | 25,00 |
| 46      | Colorectal | T3N1M1                            | Chemotherapy + Targeted therapy | 5   | 50  | 2   | 80  | 0   | 33,47 | 18,43 |
| 47      | Colorectal | T3N2M0                            | Chemotherapy                    | 60  | 95  | 2   | 0   | 2   | 59,63 | 26,40 |
| 48      | Colorectal | T3N1M0                            | Chemotherapy                    | 20  | 60  | 2   | 30  | 0   | 56,20 | 56,20 |
| 49      | Gastric    | T4N0M0                            | Chemotherapy                    | 50  | 60  | 1   | 50  | 50  | 42,70 | 42,70 |
| 50      | Colorectal | T3N0M0                            | Chemotherapy                    | 10  | 70  | 2   | 5   | 0   | 47,60 | 47,60 |
| 51      | Gastric    | T2N1M0                            | Chemotherapy                    | 15  | 75  | 2   | 2   | 0   | 38,73 | 16,70 |
| 52      | Colorectal | T3N0M0                            | Chemotherapy                    | 5   | 25  | 2   | 30  | 0   | 63,37 | 63,37 |
| 53      | Colorectal | T3N1M0                            | Chemotherapy                    | 20  | 95  | 2   | 30  | 0   | 9,00  | 9,00  |
| 54      | Gastric    | T3N3M0                            | Chemotherapy                    | 15  | 60  | 2   | 30  | 0   | 11,93 | 11,03 |
| 55      | Colorectal | T4N1M0                            | Radiotherapy                    | 20  | 30  | 1   | 15  | 0   | 34,73 | 34,73 |
| 56      | Colorectal | T2N1M0                            | Chemotherapy                    | N/A | N/A | N/A | N/A | N/A | 53,27 | N/A   |
| 57      | Colorectal | T3N1M0                            | Chemotherapy                    | 45  | 85  | 2   | 50  | 5   | 54,47 | 54,47 |
| 58      | Colorectal | T3N0M0                            | Chemotherapy                    | 70  | 90  | 2   | 90  | 20  | 50,67 | 50,67 |
| 59      | Colorectal | T3N0M0                            | Chemotherapy                    | 45  | 80  | 2   | 70  | 25  | 12,23 | 5,00  |
| 60      | Colorectal | T4N2M0                            | Chemotherapy                    | 75  | 95  | 2   | 40  | 0   | 22,47 | 4,27  |
| 61      | Colorectal | T3Nx (sigma)+ T2N0 (rectum) M1    | Radiotherapy                    | 65  | 65  | 1   | N/A | N/A | 36,47 | 3,27  |
| 62      | Colorectal | T3N0 (rectum) + T4Nx (bladder) M1 | Radiotherapy                    | 80  | 95  | 1   | 80  | 5   | 5,37  | 3,53  |



1 **Supplementary Table S7. List of oligonucleotides for RT-qPCR and ChIP-qPCR**  
 2 **and sgRNA for CIRSPR/Cas9 knockout used in this study.**  
 3

| <b>Primers for RT-qPCR</b>            |                         |                         |
|---------------------------------------|-------------------------|-------------------------|
| <b>Target</b>                         | <b>Forward</b>          | <b>Reverse</b>          |
| TP53                                  | CTTTGAGGTGCGTGTTTGTG    | GGGCAGTGCTCGCTTAGT      |
| CDKN1A                                | CCGAAGTCAGTTCCTTGTGGA   | TGGTGTCTCGGTGACAAAGT    |
| MDM2                                  | GCCATTGAACCTTGTGTGATT   | GGCAGGGCTTATTCCTTTTC    |
| PHLDA3                                | CAGCTGTGGAAGCGGAAG      | GCGAAGCTGAGCTCCTTG      |
| PLK2                                  | AATAACAAAGTCTACGCCGCA   | TCTTTGTCAATCTTTTCCCTTTG |
| ZMAT3                                 | CTAGGGCAAAGCGCAAATAG    | GACCAGCCACTCCAAAAGAG    |
| SESN1                                 | TGACCTGATGCCTTTCCTTC    | CCTGGGGCTTAGTACCTTCC    |
| LAPTM5                                | TCTTTTCCATCGCCTTCATC    | CCTTCTGGAGCATCTTGGAG    |
| TIMP2                                 | TTCCCTCCCTCAAAGACTGA    | CAAAGCCACCTACCTCCAAA    |
| CRIP2                                 | CGGTGGGCAGCTACATCTAT    | CTGAGCACTCTCCCAGCAGA    |
| KIFC3                                 | TGCCATGTACGAGTCAGAGC    | CGTTCTTGTCTCTTCCAG      |
| MRAS                                  | ACCGAGTTTTCCCATCAGTG    | TCTTTTCCCTCCCAGGTTT     |
| SERPINH1                              | CTTCATGGTGACTCGGTCTC    | CGATTTGCAGCTTTTCTTCT    |
| CD99L2                                | CGGGTTGACATGAGAAAGGT    | ATTCTGGCTTTGATGCTCGT    |
| TUBB6                                 | TGAGGGGCCACAAAATAAAC    | TATAAGGCAACACGGCACAA    |
| TPM2                                  | GGACAGAGGATGAGGTGGAA    | GCATCAGTGGCCTTCTTCTC    |
| GLIPR1                                | CGCCATCACAACTGGTATG     | ATCTGCCCAAACAACCTGAG    |
| TSPAN4                                | TGCCTCCTGCTCACTTTCTT    | GTCTTGCTGGGCATACCTGT    |
| ICAM1                                 | GAAGTGCCCTCCATAGACA     | TCAAGGGTTGGGGTCAGTAG    |
| ARL4C                                 | TGAGTCCCTGCCTATTGTCC    | CAGATGGGCTGCTAGGTTTC    |
| VAMP5                                 | CCTGAAGGAGAAGCCAAATG    | GTCAAGGGAGAGCAAACACC    |
| GPC1                                  | CCCTACGCTCATCTCTGGAA    | GACCTTGTGGAGGAAGGACA    |
| COL18A1                               | GAGGGACAAGTGGACTCAGG    | TTGGCTTACATCACACACA     |
| AGMAT                                 | TCTTTCTGGGAACACAGCCC    | CGGTTGTCACTTTGGGGAGA    |
| KCNK5                                 | GAGGTGTGAGTCTGCGGAAG    | GCCCTCGATGTAGTTCCACC    |
| CDX1                                  | ACCTCCTCTCCAATGCCTGT    | AGACTCGGACCAGACCTCCT    |
| HPRT1                                 | ATAAGCCAGACTTTGTTGG     | ATAGGACTCCAGATGTTTCC    |
| TBP                                   | GGAAGTGACATTATCAACGC    | CCAAGAAACAGTGATGCTG     |
| ACTB                                  | GCACCACACCTTCTACAATGAGC | TAGCACAGCCTGGATAGCAACG  |
| <b>Primers for ChIP-qPCR</b>          |                         |                         |
| <b>Target</b>                         | <b>Forward</b>          | <b>Reverse</b>          |
| MDM2                                  | GGGCAGGTTGACTCAGCTTTT   | AGCTGGGAAAATGCATGGTTTA  |
| BAX                                   | GGTTCCTGGCTCTCTGATCC    | AGGCTGGGCCTGTATCCTAC    |
| CDKN1A                                | AGCAGGCTGTGGCTCTGATT    | CAAATAGCCACCAGCCTCTTCT  |
| ZMAT3                                 | CAAATTGCCACAAACATTCTGC  | CTGGGGGAGACACATGCTAGA   |
| <b>sgRNA for CRISPR/Cas9 knockout</b> |                         |                         |
| <b>Target</b>                         | <b>sgRNA sequence</b>   |                         |
| TP53 – Guide 1                        | TCGACGCTAGGATCTGACTG    |                         |
| TP53 – Guide 2                        | ACCAGCAGCTCCTACACCGG    |                         |
| TP53 – Guide 3                        | CCATTGTTCAATATCGTCcG    |                         |



1 **Table S8. Materials table**

2

| REAGENT                                                | or | SOURCE                   | IDENTIFIER                       |
|--------------------------------------------------------|----|--------------------------|----------------------------------|
| <b>Antibodies</b>                                      |    |                          |                                  |
| Mouse monoclonal anti- $\gamma$ H2AX (pS139)           |    | BD Biosciences           | Cat#564719; RRID:AB_2738913      |
| Mouse monoclonal anti-Ki67 (MM1)                       |    | Leica Biosystems         | Cat#NCL-Ki67-MM1; RRID:AB_442101 |
| Rabbit polyclonal anti-Cleaved Caspase-3 (Asp175)      |    | Cell Signaling           | Cat#9661; RRID:AB_2341188        |
| Mouse monoclonal anti-p53 DO-1                         |    | Abcam                    | Cat#ab1101; RRID:AB_297667       |
| Rabbit monoclonal anti-p21 [EPR362]                    |    | Abcam                    | Cat#ab109520; RRID:AB_10860537   |
| Rabbit monoclonal anti-CKN2A/p16INK4a [EPR1473]        |    | Abcam                    | Cat#ab108349; RRID:AB_10858268   |
| Goat polyclonal anti-EphB2                             |    | RD Systems               | Cat#AF467; RRID:AB_355375        |
| Rabbit polyclonal anti-CD99L2                          |    | Abcam                    | Cat#ab224164                     |
| Mouse monoclonal anti-TIMP2 [3A4]                      |    | Abcam                    | Cat#ab1828; RRID:AB_2256129      |
| Rabbit polyclonal anti-MRas                            |    | Abcam                    | Cat#ab26303; RRID:AB_470849      |
| Anti-TUBB6                                             |    | Abcam                    | Cat#PA5-P8948                    |
| Recombinant Anti-ICAM1 antibody [EPR4776]              |    | Abcam                    | Cat#ab109361; RRID:AB_10958467   |
| Recombinant Anti-Hsp47 antibody [EPR4217]              |    | Abcam                    | Cat#ab109117; RRID:AB_10888995   |
| Recombinant Anti-YAP1 antibody [EP1674Y]               |    | Abcam                    | Cat#ab52771; RRID:AB_2219141     |
| TSPAN4 Polyclonal Antibody                             |    | Thermo Fisher Scientific | Cat#PA5-69344; RRID:AB_2688603   |
| Monoclonal Anti-S100A4 antibody produced in mouse      |    | Atlas Antibodies         | Cat#AMAB90599; RRID:AB_2665603   |
| Anti-Histone H3 antibody-Nuclear Marker and ChIP Grade |    | Abcam                    | Cat#ab791; RRID:AB_302613        |

|                                                                        |                                                        |                                                                                    |
|------------------------------------------------------------------------|--------------------------------------------------------|------------------------------------------------------------------------------------|
| Anti-Histone H4 antibody–ChIP Grade                                    | Abcam                                                  | Cat#ab10158; RRID:AB_296888                                                        |
| Mouse monoclonal anti-alpha-Tubulin (B-5-1-2)                          | Sigma-Aldrich                                          | Cat#T6074; RRID:AB_477582                                                          |
| Goat Anti-Rabbit Immunoglobulins/HRP antibody (2ary)                   | Agilent                                                | Cat#P0448; RRID:AB_2617138                                                         |
| Rabbit Anti-Mouse Immunoglobulins/HRP antibody (2ary)                  | Agilent                                                | Cat#P0260; RRID:AB_2636929                                                         |
| Polyclonal Rabbit Anti-Goat Immunoglobulins/HRP antibody (2ary)        | Agilent                                                | Cat#P0449; RRID:AB_2617143                                                         |
| <b>Biological Samples</b>                                              |                                                        |                                                                                    |
| Patient-derived organoids (PDO): PDO4, PDO5, PDO8, PDO10, PDO11, PDO15 | Hospital del Mar (Barcelona)                           | MARBiobanc ( <a href="https://marbiobanc.imim.es">https://marbiobanc.imim.es</a> ) |
| Patient-derived organoids (PDO): PDO66                                 | From Alberto Muñoz Lab (Fernández-Barral et al., 2020) | RetBioH ( <a href="http://www.redbiobancos.es">www.redbiobancos.es</a> )           |
| Human gastrointestinal tumors blocks                                   | Hospital del Mar (Barcelona)                           | MARBiobanc ( <a href="https://marbiobanc.imim.es">https://marbiobanc.imim.es</a> ) |
| <b>Chemicals, Peptides, and Recombinant Proteins</b>                   |                                                        |                                                                                    |
| Collagenase II from <i>Clostridium histolyticum</i>                    | Sigma-Aldrich                                          | Cat#C6885                                                                          |
| Hyaluronidase from bovine testes                                       | Sigma-Aldrich                                          | Cat#H3506                                                                          |
| DMEM/F-12 Advanced                                                     | GIBCO                                                  | Cat#12634028                                                                       |
| Primocin                                                               | Invitrogen                                             | Cat#ant-pm-1                                                                       |
| B-27 Supplement (50X)                                                  | GIBCO                                                  | Cat#17504044                                                                       |
| N-2 supplement (100X)                                                  | GIBCO                                                  | Cat#17502048                                                                       |
| Nicotinamide                                                           | Sigma-Aldrich                                          | Cat#N3376                                                                          |
| N-Acetyl-L-cysteine                                                    | Sigma-Aldrich                                          | Cat#A7250                                                                          |

|                                                      |                   |                 |
|------------------------------------------------------|-------------------|-----------------|
| Recombinant Human Noggin                             | PeproTech         | Cat#120-10C     |
| Recombinant Human R-Spondin-1                        | PeproTech         | Cat#120-38      |
| Y-27632 dihydrochloride (ROCK inhibitor)             | Sigma-Aldrich     | Cat#Y0503       |
| Prostaglandin E2                                     | Tocris            | Cat#2296        |
| SB 202190                                            | Sigma-Aldrich     | Cat#S7067       |
| A8301 (ALK inhibitor)                                | Sigma-Aldrich     | Cat#SML0788     |
| hEGF                                                 | Sigma-Aldrich     | Cat#E9644       |
| Gastrin I (human)                                    | Tocris            | Cat#3006        |
| Corning Matrigel Basement Membrane Matrix, LDEV-free | Corning           | Cat#354234      |
| 5-Fluorouracil (5-FU)                                | Accord Healthcare | Cat#606544.3    |
| Irinotecan                                           | Accord Healthcare | Cat#713386.5    |
| Dasatinib                                            | Selleckchem       | Cat#S1021       |
| Verteporfin                                          | Selleckchem       | Cat#S1786       |
| D-Luciferin                                          | Goldbio           | Cat#LUCK        |
| PhosSTOP phosphatase inhibitor cocktail              | Roche             | Cat#PHOSS-RO    |
| cOmplete Mini protease inhibitor cocktail            | Roche             | Cat#11836170001 |
| DPX mountant                                         | Sigma-Aldrich     | Cat#06522       |
| DAPI Fluoromount-G                                   | Southern Biotech  | Cat#0100-20     |
| Protein A-Sepharose CL-4B                            | GE Healthcare     | Cat#17-0780-01  |
| Protein G-Sepharose 4 Fast Flow                      | GE Healthcare     | Cat#17-0618-01  |

| <b>Critical Commercial Assays</b>                      |                             |                 |
|--------------------------------------------------------|-----------------------------|-----------------|
| Dako Envision+ System-HRP Labelled Polymer anti-Rabbit | Agilent                     | Cat#K4003       |
| Envision+ System-HRP Labelled Polymer anti-Mouse       | Agilent                     | Cat#K4001       |
| Dako Liquid DAB+ Substrate Chromogen System            | Agilent                     | Cat#K3468       |
| TSA Plus Cyanine 3/Fluorescein System                  | PerkinElmer                 | Cat#NEL753001KT |
| EZ-ECL Chemiluminescence Detection Kit for HRP         | Biological Industries       | Cat#20-500-120  |
| ECL Prime Western Blotting System                      | GE Healthcare               | Cat#RPN2232     |
| CellTiter-Glo Luminescent Cell Viability Assay         | Promega                     | Cat#G7571       |
| APC BrdU Flow Kit                                      | BD Biosciences              | Cat#552598      |
| Senescence $\beta$ -Galactosidase Staining Kit         | Cell Signaling              | Cat#9860S       |
| Cell Event Senescence Green Flow Cytometry Assay Kit   | Invitrogen                  | Cat#C10840      |
| CometAssay Kit                                         | Trevigen                    | Cat#4250-050-K  |
| RNeasy Micro Kit                                       | Qiagen                      | Cat#74004       |
| RT-First Strand cDNA Synthesis Kit                     | GE Healthcare Life Sciences | Cat#27-9261-01  |
| SYBR Green I Master Kit                                | Roche                       | Cat#04887352001 |
| Annexin V Apoptosis Detection Kit APC                  | Invitrogen                  | Cat#88-8007     |
| Lenti-X Concentrator                                   | Clontech                    | Cat#631232      |
| <b>Experimental Models: Cell Lines</b>                 |                             |                 |

|                                               |                                             |                                                                                      |
|-----------------------------------------------|---------------------------------------------|--------------------------------------------------------------------------------------|
| Human: HEK293T                                | ATCC                                        | CRL-11268                                                                            |
| Human: HCT116                                 | ATCC                                        | CCL-247                                                                              |
| Human: Ls174T                                 | ATCC                                        | CL-188                                                                               |
| Human: SW480                                  | ATCC                                        | CCL-228                                                                              |
| Human: HT29                                   | ATCC                                        | HTB-38D                                                                              |
| <b>Experimental Models: Organisms/Strains</b> |                                             |                                                                                      |
| Mouse: NU/J ( <i>Foxn1<sup>tm</sup></i> )     | The Jackson Laboratory                      | JAX: 002019                                                                          |
| <b>Oligonucleotides</b>                       |                                             |                                                                                      |
| Primers for RT-qPCR, see Table S7             | This study                                  | N/A                                                                                  |
| Primers for Chip-qPCR, see Table S7           | This study                                  | N/A                                                                                  |
| gRNA against <i>TP53</i> , see Table S7       | This study                                  | N/A                                                                                  |
| <b>Recombinant DNA</b>                        |                                             |                                                                                      |
| Plasmid: pMD2.G                               | From Trono Lab, unpublished                 | Addgene plasmid #12259                                                               |
| Plasmid: pCMV-dR8.2 dvpr                      | Stewart et al., 2003                        | Addgene plasmid #8455                                                                |
| Plasmid: lentiCRISPR v2                       | Sanjana et al., 2014                        | Addgene plasmid #52961                                                               |
| Plasmid: pLEX-hFLiG                           | Celià-Terrassa & Kang, 2018                 | N/A                                                                                  |
| Plasmid: pLTPC-H2BeGFP                        | Gift from Héctor G. Palmer Lab, unpublished | N/A                                                                                  |
| <b>Software and Algorithms</b>                |                                             |                                                                                      |
| GraphPad Prism 6                              | Graphpad Software                           | <a href="https://www.graphpad.com">https://www.graphpad.com</a> ; RRID:SCR_002798    |
| Fiji (Image J)                                | Schneider et al., 2012                      | <a href="https://www.fiji.sc">https://www.fiji.sc</a> ; RRID: SCR_002285             |
| Benchling CRISPR design                       | Benchling                                   | <a href="https://www.benchling.com">https://www.benchling.com</a> ; RRID: SCR_013955 |
| FlowJo 10.6.2                                 | BD Biosciences                              | <a href="https://www.flowjo.com">https://www.flowjo.com</a> ; RRID: SCR_008520       |



|                      |                    |                                                                                                                                                                                                                                                                              |
|----------------------|--------------------|------------------------------------------------------------------------------------------------------------------------------------------------------------------------------------------------------------------------------------------------------------------------------|
| LightCycler Software | Roche              | <a href="http://www.roche-applied-science.com/shop/products/absolute-quantification-with-the-lightcycler-carousel-based-system">http://www.roche-applied-science.com/shop/products/absolute-quantification-with-the-lightcycler-carousel-based-system</a> ; RRID: SCR_012155 |
| Adobe Photoshop      | Adobe Software     | <a href="https://www.adobe.com/products/photoshop.html">https://www.adobe.com/products/photoshop.html</a> ; RRID: SCR_014199                                                                                                                                                 |
| RStudio              | RStudio Team       | <a href="https://rstudio.com/">https://rstudio.com/</a>                                                                                                                                                                                                                      |
| GSEA                 | Broad Institute    | <a href="https://www.gsea-msigdb.org/gsea/index.jsp">https://www.gsea-msigdb.org/gsea/index.jsp</a>                                                                                                                                                                          |
| ggplot               | Bioconductor       |                                                                                                                                                                                                                                                                              |
| Corrplot             | CRAN               | <a href="https://cran.r-project.org/web/packages/corrplot/index.html">https://cran.r-project.org/web/packages/corrplot/index.html</a>                                                                                                                                        |
| Survminer            | CRAN               | <a href="https://CRAN.R-project.org/package=survminer">https://CRAN.R-project.org/package=survminer</a>                                                                                                                                                                      |
| Survival             | CRAN               | <a href="https://CRAN.R-project.org/package=survival">https://CRAN.R-project.org/package=survival</a>                                                                                                                                                                        |
| Heatmaply            | CRAN               | <a href="https://CRAN.R-project.org/package=heatmaply">https://CRAN.R-project.org/package=heatmaply</a>                                                                                                                                                                      |
| Pheatmap             | CRAN               | <a href="https://CRAN.R-project.org/package=pheatmap">https://CRAN.R-project.org/package=pheatmap</a>                                                                                                                                                                        |
| Limma                | Bioconductor       | <a href="https://bioconductor.org/packages/release/bioc/html/limma.html">https://bioconductor.org/packages/release/bioc/html/limma.html</a>                                                                                                                                  |
| DESeq2 R package     | Bioconductor       | <a href="https://bioconductor.org/packages/release/bioc/html/DESeq2.html">https://bioconductor.org/packages/release/bioc/html/DESeq2.html</a>                                                                                                                                |
| TopHat               | Kim et al 2013     | <a href="https://ccb.jhu.edu/software/tophat/index.shtml">https://ccb.jhu.edu/software/tophat/index.shtml</a>                                                                                                                                                                |
| HTSeq                | Anders et al. 2015 | <a href="https://htseq.readthedocs.io/en/master/">https://htseq.readthedocs.io/en/master/</a>                                                                                                                                                                                |
